# Supplementary material for: Journey to vaccination: a protocol for a multinational qualitative study
Source: PubMed Central journal article supplement — BMJ Open. 2014 Jan 30;4(1):e004279. doi: 10.1136/bmjopen-2013-004279 (PMC3913205; doi:10.1136/bmjopen-2013-004279), 2014-01-30
Supplement: bmjopen-2013-004279.draft_revisions.pdf [file bmjopen-2013-004279.draft_revisions.pdf]

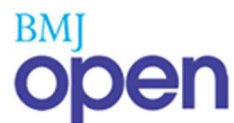

**Journey to vaccination: a protocol for a multinational qualitative study**

|                                 |                                                                                                                                                                                                                                                                                                                      |
|---------------------------------|----------------------------------------------------------------------------------------------------------------------------------------------------------------------------------------------------------------------------------------------------------------------------------------------------------------------|
| Journal:                        | <i>BMJ Open</i>                                                                                                                                                                                                                                                                                                      |
| Manuscript ID:                  | bmjopen-2013-004279                                                                                                                                                                                                                                                                                                  |
| Article Type:                   | Protocol                                                                                                                                                                                                                                                                                                             |
| Date Submitted by the Author:   | 17-Oct-2013                                                                                                                                                                                                                                                                                                          |
| Complete List of Authors:       | Wheelock, Ana; Imperial College London, Surgery and Cancer<br>Miraldo, Marisa; Imperial College London, Business School<br>Parand, Anam; Imperial College London, Surgery and cancer<br>Vincent, Charles; Imperial College London, Surgery and Cancer<br>Sevdalis, Nick; Imperial College London, Surgery and Cancer |
| <b>Primary Subject Heading</b>: | Public health                                                                                                                                                                                                                                                                                                        |
| Secondary Subject Heading:      | Qualitative research, Infectious diseases                                                                                                                                                                                                                                                                            |
| Keywords:                       | PUBLIC HEALTH, QUALITATIVE RESEARCH, INFECTIOUS DISEASES                                                                                                                                                                                                                                                             |
|                                 |                                                                                                                                                                                                                                                                                                                      |

SCHOLARONE™  
Manuscripts

Peer Review Only

1  
2  
3 **JOURNEY TO VACCINATION: A PROTOCOL FOR A MULTINATIONAL**  
4 **QUALITATIVE STUDY**  
5  
6  
7

8  
9 Ana Wheelock, MSc<sup>1†</sup>; Marisa Miraldo, PhD<sup>2</sup>; Anam Parand, PhD<sup>1</sup>; Charles Vincent, PhD<sup>1</sup>; Nick  
10  
11 Sevdalis, PhD<sup>1</sup>  
12

13  
14  
15 <sup>1</sup>Faculty of Medicine, Imperial College London, UK; <sup>2</sup>Imperial College Business School  
16

17  
18  
19 †Corresponding author  
20

21  
22  
23 Imperial College London  
24

25 Medical School Building  
26

27 St Mary's Campus  
28

29 Norfolk Place  
30

31 London, W2 1PG  
32  
33

34  
35 Tel: 020 7594 3433  
36

37 [a.wheelock@imperial.ac.uk](mailto:a.wheelock@imperial.ac.uk)  
38  
39

40  
41 Word count: 3472  
42

43  
44 Keywords – vaccine, influenza, tetanus, qualitative, social, psychological  
45  
46

47  
48 The Corresponding Author has the right to grant on behalf of all authors and does grant on behalf of  
49 all authors, an exclusive licence (or non exclusive for government employees) on a worldwide basis to  
50 the BMJ Publishing Group Ltd and its Licensees to permit this article (if accepted) to be published in  
51 BMJ editions and any other BMJPG products and sublicences to exploit all subsidiary rights, as set  
52 out in their licence (<http://resources.bmj.com/bmj/authors/checklists-forms/licence-for-publication>).  
53  
54  
55  
56  
57  
58  
59  
60

**ABSTRACT****Objectives:**

To provide a detailed account of a mixed method qualitative approach designed to understand the wider constellation of social and psychological factors likely to influence adult influenza (flu) and tetanus vaccination decisions, and their relative importance, as well as the context in which these decisions take place.

**Setting:**

US, UK, France, India, China and Brazil.

**Methods and analysis:**

We employ a combination of qualitative interviewing approaches to reach a comprehensive understanding of the factors influencing adult vaccination decisions. To elicit underlying beliefs, attitudes and preferences affecting vaccination decisions, specifically seasonal flu and tetanus, we developed the *journey to vaccination*, a new qualitative approach anchored on the *heuristics and biases* tradition and the *customer journey mapping* approach. A purposive sampling strategy is used to select adult participants who were both vaccinated and not vaccinated against flu and tetanus and represented a range of socio-demographic characteristics associated with vaccination uptake. Using thematic analysis, an initial categorising system will be developed based on the study objectives and the topics explored. New themes and sub-themes emerging from the data analysis will be identified and included when consensus is reached regarding their relevance. Additionally, typical journeys to vaccination will be identified and described.

**Conclusions:**

Vaccination uptake is significantly influenced by social and psychological factors, some of which may be underreported and poorly understood. Our journey to vaccination approach is designed to uncover underlying motivations which may be driving vaccination behaviour across different contexts. Our findings will provide a deeper understanding of the barriers and drivers to adult vaccination.

## ARTICLE SUMMARY

### Article focus

A protocol of a mixed method qualitative study aiming to elicit underlying beliefs, attitudes and preferences affecting adult vaccination decisions.

### Key messages

- Vaccination decision-making is significantly influenced by social and psychological factors and often driven by intuition.
- People tend to fall back on readily available information and report post-decisional rationalisations of their behaviours rather than actual drivers, particularly when these are perceived to be unfounded.
- To better understand vaccination behaviour, we need to go beyond readily available responses and explore individuals' context, personal circumstances and past experiences, and how they influence vaccination decisions over time.

### Strengths and limitations of this study

- The *journey to vaccination*, a multidisciplinary qualitative approach, is used to elicit underlying beliefs, attitudes and preferences affecting vaccination decisions.
- A multinational and relevant sample population will be recruited.
- The interview schedules and local interviewers' training are standardised, which will enable data comparability.
- Challenges in recruiting specific participant categories may be encountered and cross-cultural variations will need to be documented and explained.

## BACKGROUND

In the last two decades, childhood vaccination coverage has increased dramatically, averting an estimated 2 to 3 million deaths per year, along with myriad episodes of illness and disability[1 2].

Adult vaccination coverage, however, remains poorly recorded and substandard[2 3].

Two important adult routine vaccines are seasonal influenza (flu) and tetanus containing vaccines[4]. An annual flu vaccine is recommended to all adults, particularly those aged  $\geq 65$  years and under 65s with certain medical conditions such as asthma, heart disease and diabetes. Despite this recommendation, in any given year flu epidemics can cause between 500,000 and 1,000,000 deaths globally[5]. A tetanus containing booster is recommended every ten years to prevent tetanus and other diseases such as pertussis, diphtheria and polio. Although tetanus morbidity and mortality is mostly neo-natal and maternal, globally, an estimated 13,000 annual non-maternal adults deaths are due to tetanus infection. Moreover, it has been established that unvaccinated adolescents and adults, or those with waning immunity, have become a major source of pertussis infection for unvaccinated infants[6]. The World Health Organisation (WHO) estimated that in 2008, 195,000 children under 5 years of age died from pertussis and 199,000 from flu, many of whom were infected by an adult[7].

Although structural barriers, such as access to care and vaccine availability, are known to limit coverage, social and psychological factors can also affect vaccine uptake. For example, perceived susceptibility to flu and concerns about vaccine safety and effectiveness have been shown to significantly influence vaccination behaviour[8 9]. The relevance of these factors to vaccination decisions has become a focus of policy discussions, such that national and supranational immunisation advisory committees are now evaluating how to best measure confidence in vaccines to inform and evaluate future interventions[10].

Making decisions about our own health in general, and vaccinations in particular, can be a difficult task. Typically, it involves navigating an often intricate healthcare system, discussing the issue with a healthcare professional (HCP), researching the internet, consulting family members and peers, and

1  
2  
3 trying to make sense of all the available information, which is likely to be incomplete and  
4  
5 conflicting[11]. A key challenge in decision-making processes regarding health is weighing up the  
6  
7 benefits of an intervention versus its potential harm. In the case of vaccinations, this process can be  
8  
9 particularly complex as it often entails the assessment of several disease-related variables including  
10  
11 severity, likelihood of catching the pathogen and susceptibility to it, as well as vaccine attributes such  
12  
13 as effectiveness, side-effects and safety, among others[12]. Furthermore, the benefits and drawbacks  
14  
15 of vaccines are normally conveyed in statistical terms, a language that has proven to be difficult to  
16  
17 grasp for most people. For example, results from an experimental study showed that 16% to 20% of  
18  
19 highly educated participants incorrectly answered relatively simple questions about risk magnitudes  
20  
21 (e.g., which represents the larger risk: 1%, 5%, or 10%?)[13]. It is, therefore, conceivable that a  
22  
23 significantly larger proportion of less educated individuals, who constitute a majority of the  
24  
25 population, are likely to misunderstand this type of data.  
26  
27

28  
29 A vast body of research has demonstrated that when people are unable to assess risk using statistical  
30  
31 reasoning they often rely on heuristics, an experience-based and intuitive approach used to facilitate  
32  
33 decision-making[14-16]. Heuristics represent what psychologists have termed ‘cognitive shortcuts’, in  
34  
35 other words, they allow an inference to be made regarding risk without going through numerous  
36  
37 analytical calculations. By its very nature, the use of heuristics can be efficient and accurate in some  
38  
39 occasions, but it can also lead to cognitive errors and flawed decision making when used in  
40  
41 circumstances that require thorough logical analysis[17]. Furthermore, individuals’ judgement is often  
42  
43 influenced by their context and personal or family experiences, whether these are conscious or  
44  
45 not[18].  
46  
47

48  
49 Although qualitative studies have explored beliefs, attitudes and preferences associated with flu  
50  
51 vaccination uptake, thus far, little research has investigated how participants’ own context and  
52  
53 experiences influence their vaccination decision-making process over time[19-21]. Furthermore, most  
54  
55 studies focus on populations from developed countries; relevant evidence from developing countries  
56  
57  
58  
59  
60

1  
2  
3 is largely missing. Qualitative research on adult tetanus boosters is limited and focuses on neonatal  
4  
5 tetanus.  
6  
7

8  
9 This article aims to provide a detailed account of a mixed method qualitative approach designed to  
10  
11 understand the wider constellation of social and psychological factors likely to influence adult  
12  
13 vaccination behaviour, and their relative importance, as well as the context in which these decisions  
14  
15 take place. Our focus is on social influences, beliefs and attitudes affecting the uptake of seasonal flu  
16  
17 vaccines and tetanus boosters, as these aspects have been found to be particularly influential in  
18  
19 vaccination decision-making. Our research will be conducted in key developed and developing  
20  
21 economies – US, UK, France, India, China and Brazil.  
22  
23

## 24 25 **CONCEPTUAL FRAMEWORK**

26  
27 The methodology of this study rests on two theoretical approaches: *heuristics and biases*, specifically  
28  
29 the *availability* heuristic[22], and *customer journey mapping*[23-25]. We explain these below.  
30  
31

32  
33 As mentioned in the previous section, people rely on a limited number of heuristics which reduce the  
34  
35 complexity of calculating probabilities and predicting outcomes to simpler mental operations. A  
36  
37 frequently used heuristic is availability, the tendency to make judgements about the frequency or  
38  
39 probability of an event based on the ease with which a similar episode can be recalled[26]. The use of  
40  
41 this heuristic could yield accurate actions but it could also lead to erroneous decisions. For example, a  
42  
43 high-risk individual may be prompted to have a flu vaccine after being exposed to extensive media  
44  
45 coverage about one single flu-related death. The following season, he may decide not to have the flu  
46  
47 vaccine due to a friend experiencing side-effects (e.g. flu-like symptoms) after receiving a flu vaccine.  
48  
49 In both cases, his decision-making is determined by the ease with which the risks associated with flu  
50  
51 or the flu vaccine spring to mind (which vary between the two seasons), as opposed to the statistical  
52  
53 probability of experiencing either adverse effect (which may be constant across the two seasons). The  
54  
55 first decision, however, is aligned with current vaccination recommendations, whereas the second is  
56  
57 not.  
58  
59  
60

1  
2  
3 Additionally, it has been established that people's evaluation of the logical strength of an argument is  
4 often biased by their pre-existent belief in the truth or falsity of the conclusion[27]. For example, if  
5 the same high-risk individual distrusts the medical establishment and the pharmaceutical industry and  
6 prefers alternative medicine instead, it is likely that the news about a flu-related death will have a  
7 lesser impact on his vaccination decision than his friend's reported side-effects – due to mentally  
8 over-weighting the vaccine adverse effects, which are consistent with his pre-existing beliefs.  
9 Importantly, belief-based decision-making need not be conscious[28 29]. Thus, a decision based on  
10 intuition may be later post-rationalised and explained using analytical-sounding arguments, when in  
11 reality cost-benefit analysis was not employed.  
12  
13  
14  
15  
16  
17  
18  
19  
20  
21

22  
23 The customer journey mapping approach is commonly used in service design to capture and evaluate  
24 people's experience of different services. Although some elements may be more important than  
25 others, this approach considers the overall experience of the service user as the result of every element  
26 in a journey through a service. Of particular note is the *brand touchpoint wheel* developed a decade  
27 ago by Dunn and Davies[30]. This conceives the customer journey as a wheel comprised of three  
28 main stages (pre-purchase, purchase and post-purchase experience) and a number of *touchpoints*,  
29 which are key points at which the consumer interacts with a particular product or service (see Fig. 1).  
30  
31  
32  
33  
34  
35  
36  
37  
38  
39

#### 40 **Our approach: *journey to vaccination***

41 Most qualitative studies in the field of vaccination decision-making have elicited barriers and enablers  
42 to vaccination using traditional methodological approaches such as explicit enquiry (e.g. why did you  
43 vaccinate?) and indiscriminate use of probes, often within a focus group setting. A key shortcoming of  
44 these approaches is that individuals' context, personal circumstances and past experiences, and how  
45 they influence vaccination decisions over time, is seldom explored. Thus, researchers may fail to  
46 notice participants' tendency to fall back on readily available information and report post-decisional  
47 rationalisations of their behaviours rather than actual drivers.  
48  
49  
50  
51  
52  
53  
54  
55  
56  
57  
58  
59  
60



1  
2  
3 In an effort to address these shortcomings, we developed a new qualitative approach which we call  
4 *journey to vaccination*. Anchored on the two complementary lines of thought described above and  
5  
6  
7 nested within the qualitative research tradition, the journey to vaccination is a visual exercise in which  
8  
9 the interviewer and the participant jointly build a timeline that captures salient events that led the  
10  
11 participant to get or not to get vaccinated. The exercise starts with a participant's latest flu or tetanus  
12  
13 vaccination experience as an adult; it then extends backwards to the participant's first memory of such  
14  
15 experience. The participant is asked to describe these events, which in turn allows the interviewer to  
16  
17 indirectly elicit a range of factors that affected positively or negatively the decision to get vaccinated.  
18  
19 Importantly, this exercise enables the participant to produce a personal historical narrative, through  
20  
21 which vaccination decisions are discussed as a continuum and not in isolation from each other or from  
22  
23 other important health, or lifestyle-related decisions.  
24

25  
26  
27 The journey to vaccination approach is designed to comprehensively capture psychological but also  
28  
29 social influences on vaccination decisions. Participants will, therefore, be asked to recall key actors  
30  
31 who were involved in the vaccination process (e.g. their family) and how they influenced the process.  
32  
33 Emotional aspects of the decision making are also explored and taken into account.  
34

35  
36  
37 Based on the customer journey mapping approach described earlier and previous evidence on  
38  
39 vaccination behaviour, we envisage a journey to vaccination to be comprised of three stages and a  
40  
41 number of touchpoints at which the individual interacts with related health services (Figure 2): 1) pre-  
42  
43 vaccination period (appointment with HCP, information – websites, news, vaccination campaigns –  
44  
45 and HCP reminders); 2) the vaccination experience itself (location, consultation experience and  
46  
47 vaccination experience); and 3) a post-vaccination experience (vaccine quality – e.g. side-effects,  
48  
49 effectiveness – and post-vaccination advice or information – from HCP, peers and other sources)[9 30  
50  
51 31]. An important component of a journey to vaccination is a cue to action or trigger, which consists  
52  
53 of an internal or external stimulus (e.g. salient health related experiences, advice from a relative) that  
54  
55 prompts individuals to vaccinate or not to vaccinate. Existing evidence suggests that vaccination  
56  
57 triggers may usually take place during the pre-vaccination stage and could sometimes overlap with  
58  
59  
60

1  
2  
3 vaccination touchpoints[9]. For example, a vaccination reminder letter from the general practitioner  
4  
5 would be both a trigger and a touchpoint, if participants explicitly mention that the letter prompted  
6  
7 them to vaccinate.  
8  
9

10  
11 Figure 3 illustrates a journey to flu non-vaccination of a participant from the UK pilot (see Procedure  
12  
13 section below) who is not at high-risk (i.e. not eligible for free vaccination). The participant  
14  
15 mentioned that an allergy to penicillin discovered when he was younger, which his doctor refused to  
16  
17 acknowledge, had made him anxious about other medications' side-effects, including vaccines. This  
18  
19 was recorded as the first relevant touchpoint and trigger away from vaccination. He then pointed out  
20  
21 that some time ago he had heard on the news there had been flu-related deaths, and that this had been  
22  
23 a cause for concern which made him consider having a flu shot (another touchpoint and trigger to  
24  
25 vaccination). Subsequently, he recalled having the flu and worrying about the consequences of being  
26  
27 out of work due to his self-employed status (trigger to vaccination). The participant then reported that  
28  
29 at that stage he had tried to get a flu vaccine at a pharmacy, but it was out of stock (touchpoint and  
30  
31 trigger away from vaccination). Finally, the participant remembered the vaccine could have side-  
32  
33 effects and decided to stop trying to get vaccinated (trigger away from vaccination). This journey,  
34  
35 therefore, does not include a post-vaccination stage. Importantly, analysis of the participant's account  
36  
37 of his journey to non-vaccination indicates a tendency to make decisions based on heuristics rather  
38  
39 than logical analyses. For example, the participant's motivation to have a flu shot after hearing on the  
40  
41 news about flu-related deaths was based on the mental availability of this piece of information and not  
42  
43 his actual risk of death from flu.  
44  
45  
46  
47

## 48 **STUDY AIMS**

49  
50 The primary aim of this study is to gain deeper understanding of the social and psychological factors  
51  
52 influencing the uptake of two different adult vaccines across key high and middle-income countries  
53  
54 with diverse healthcare systems: The US, the UK and France, India, China and Brazil. Specifically,  
55  
56 we are interested in exploring how people's experiences shape their beliefs, attitudes and behaviour  
57  
58 towards vaccines. A secondary objective is to develop more effective methods to elicit such data.  
59  
60

## METHODS

### Setting

This research is conducted in rural and urban areas in six countries: the US (New York and Chicago), UK (London and Birmingham), France (Paris and Lille), India (New Delhi and Mumbai), China (Shanghai and Beijing) and Brazil (São Paulo and Rio de Janeiro).

### Sampling and recruitment

A purposive sampling strategy is used to select adult participants who are both vaccinated and not vaccinated against flu and tetanus and represented a range of socio-demographic characteristics associated with vaccination uptake, notably age and health status (see Table 1). In an effort to reduce recall bias[10], only those who have been vaccinated in the past 12 months are eligible to participate. Participants are recruited via telephone, sourced from telephone directories. For consistency, a minimum of 20 participants are recruited per country[12].

**Table 1. Purposive sampling strategy**

| KEY DEMOGRAPHIC CHARACTERISTICS            | Minimum participant quota per country |
|--------------------------------------------|---------------------------------------|
| Eligible chronic condition                 | 7 with                                |
|                                            | 7 without                             |
| Gender                                     | 8 female                              |
|                                            | 8 male                                |
| Parent/Guardian of child/children under 18 | 4 Mothers                             |
|                                            | 4 Fathers                             |
| Age                                        | 8 18-49                               |
|                                            | 4 50-64                               |
|                                            | 6 ≥65                                 |
| Socio-economic group (social grade)*       | 7 ABC1                                |
|                                            | 7 C2DE                                |
| Adults who have had ONE of the vaccines    | 4 Flu                                 |
|                                            | 3 Tetanus                             |
| Have had both tetanus and flu vaccines     | 6                                     |
| Have not had either vaccination            | 6                                     |
| Rural/urban (except UK and France)         | 5                                     |
| <b>TOTAL</b>                               | <b>20</b>                             |

\*A = higher socio-economic group and E = lower socioeconomic group. We used country-specific occupation and income data to determine participants' social grade.

1  
2  
3 We prioritise unvaccinated participants who state that they would either probably get vaccinated  
4 against flu or tetanus “one day” or that they would probably not get vaccinated against flu or tetanus,  
5 as these attitudes are representative of the majority of the non-vaccinated population. This is done via  
6 the following screening question at the time of recruitment: “Which of the following statements most  
7 closely reflects your attitude to the flu and tetanus vaccinations? 1) I will definitely get vaccinated  
8 against flu or tetanus one day; 2) I will probably get vaccinated against get vaccinated against flu or  
9 tetanus one day; 3) I will probably not get vaccinated against flu or tetanus; 4) I will definitely not get  
10 vaccinated against flu or tetanus”.

### 21 Procedure

22  
23 The data collection is carried out jointly by the first author (UK and US) and Ipsos MORI, a  
24 multinational market research firm and their associates . Interviewers have been trained either face-to-  
25 face or via teleconference (US) by Ipsos MORI researchers. They have also been provided with a  
26 manual containing detailed interview instructions. Interview guides and materials have been translated  
27 into French (France), Hindi, Marathi and Kannada (India), Chinese (China) and Portuguese (Brazil)  
28 by the local research teams. Interviews are carried out by trained interviewers from Imperial College  
29 London, the market research company Ipsos MORI or their local associates. Participants are  
30 interviewed face-to-face in their native language for approximately 60 minutes at home or a central  
31 interviewing facility and interviews are digitally recorded. Participants are fully informed about the  
32 study via a participant information sheet. Written consent is obtained and each participant receives an  
33 equivalent of £11-£78 incentive, depending upon the country and location of the interview, in return  
34 for their time. Before commencing each interview, participants are reminded about the strict  
35 confidentiality of their responses. Prior to data collection, the study was approved by Imperial College  
36 Research Ethical Committee (ICREC) in the UK, American Institutes for Research (AIR) in the US,  
37 Commission nationale de l'informatique et des libertés (CNIL) and Comité de protection des  
38 personnes “Ile-de-France III” in France, Safe Search Independent Ethics Committee in India,  
39 Shanghai Clinical Research Center in China and Comissão Nacional de Ética em Pesquisa (CONEP)  
40 in Brazil.

1  
2  
3  
4  
5 A pre-pilot was conducted with N = 4 (two researchers from Imperial College London and two from  
6 Ipsos MORI not involved in the present study) to test duration and flow of the interview.  
7

8  
9 Consequently, the interview guide was simplified and shortened. These interviews will not be  
10 included in the final sample for analysis. A piloting technique was subsequently used for the first  
11 three interviews in the UK, whereby the research team observed each interview behind a one-way  
12 mirror and evaluated its quality in real-time. At the end of the session, minor amendments to the  
13 interview guide were agreed and the final interview materials produced.  
14  
15  
16  
17  
18

19  
20  
21 We use two semi-structured and probing interview schedules, one for vaccinated and one for non-  
22 vaccinated participants, constructed through expert consultations and a literature review[9] (See Table  
23 2). We employ a combination of interviewing techniques to reach a comprehensive understanding of  
24 the factors underpinning vaccination decisions. The schedule comprises six sections – as follows:  
25  
26  
27  
28

29  
30  
31 Section 1 aims to obtain an overview of participants' life and values, to build rapport and to identify  
32 important issues to assist with probing throughout the interview.  
33  
34

35  
36  
37 Section 2 aims to elicit participants' general information-seeking behaviours and influences. We  
38 explore information sources (e.g. media, family, peers, etc.) through which people's knowledge about  
39 and attitudes towards vaccines may be formed.  
40  
41  
42  
43

44  
45  
46 Section 3 examines participants' views towards health, HCPs and adult vaccines. This section aims to  
47 understand how people's perceptions towards their own health and their relationship with HCPs  
48 influence their stance on vaccines. General views on adult vaccines are evaluated by asking  
49 participants to arrange five adult vaccinations (flu, tetanus, pneumonia, hepatitis and measles, mumps  
50 and rubella (MMR)) into one or more groups. By identifying how people group vaccines, and the  
51 reasons for their groupings, we aim to contextualise and gain deeper understanding of their views on  
52 flu vaccines and tetanus containing boosters.  
53  
54  
55  
56  
57  
58  
59  
60

1  
2  
3  
4  
5 Section 4 explores participants' journeys to vaccination (or non-vaccination) for both flu vaccines and  
6 tetanus containing boosters. We aim to undertake an in-depth exploration of the vaccination decision-  
7 making process by identifying important aspects that lead people to vaccinate or not to vaccinate.  
8  
9

10  
11  
12  
13 In an effort to circumvent availability bias, we avoid asking direct questions such as 'why did you  
14 have a flu shot?' Instead, we explore the set of circumstances and emotions that drive participants to  
15 accept or refuse vaccination, aided by an elicitation technique called *laddering*, which provides a  
16 simple and systematic way of establishing people's core values and beliefs, and the linkages between  
17 these and key behaviours, in this case, vaccination[32]. To avoid post-rationalisation, we do not use  
18 probes in this section of the interview.  
19  
20  
21  
22  
23  
24  
25  
26

27 Section 5 of the interview examines participants' attitudes toward children's vaccinations. We aim to  
28 understand whether people's views about adult vaccines correspond with their views about children's  
29 and how.  
30  
31  
32  
33  
34

35 Finally, in section 6 we explore participants' knowledge of the two diseases and vaccines (i.e. flu and  
36 tetanus) to understand to what extent their decision-making is influenced by facts.  
37  
38  
39  
40

41 Key socio-demographic information is collected at the end of the interview – including employment  
42 status, occupation, health insurance, perceived ability to afford essential goods, level of education,  
43 marital status, religion and ethnicity.  
44  
45  
46  
47  
48  
49  
50  
51  
52  
53  
54  
55  
56  
57  
58  
59  
60

**Table 2. Interview schedule**

| Interview topic (sections 1-6)                               | Key interview questions                                                                                                                                                                                                                                                                                                                                                                                                                                                                                                                                                                                                                                                                                                                                                                                                                                                                                                                          |
|--------------------------------------------------------------|--------------------------------------------------------------------------------------------------------------------------------------------------------------------------------------------------------------------------------------------------------------------------------------------------------------------------------------------------------------------------------------------------------------------------------------------------------------------------------------------------------------------------------------------------------------------------------------------------------------------------------------------------------------------------------------------------------------------------------------------------------------------------------------------------------------------------------------------------------------------------------------------------------------------------------------------------|
| 1. Overview of life and values                               | <ul style="list-style-type: none"> <li>• Tell me about yourself and your life, for example, what you spend your time doing and how you enjoy yourself.</li> <li>• What sorts of things do you worry about?</li> </ul>                                                                                                                                                                                                                                                                                                                                                                                                                                                                                                                                                                                                                                                                                                                            |
| 2. Information seeking behaviours and influences             | <ul style="list-style-type: none"> <li>• Can you tell me how you find out what is happening generally in the world?</li> <li>• And who are the people whose opinion you value or with whom you discuss important issues with? And why is that?</li> </ul>                                                                                                                                                                                                                                                                                                                                                                                                                                                                                                                                                                                                                                                                                        |
| 3. Views about health and vaccinations                       | <ul style="list-style-type: none"> <li>• Can I ask how you feel your own health is?</li> <li>• When you think about your health, what are all the things that come to mind? Do you do anything to keep healthy? What sorts of things?</li> <li>• Which doctors or nurses do you particularly trust and listen to, if any? And why is that? Why is that important to you?</li> <li>• Thinking now about vaccinations, what are all the things that come to mind when you think about vaccinations?</li> <li>• Looking at these cards, which are all adult vaccinations, please can you sort them into groups?</li> </ul>                                                                                                                                                                                                                                                                                                                          |
| 4. Journey to vaccination (or non-vaccination)               | <ul style="list-style-type: none"> <li>• How would you describe to a friend how you came to have (or not to have) the vaccination? What things happened that meant you ended up getting (or not getting) vaccinated?</li> <li>• What would you say happened at that point that triggered that change (or decision)? And why was that important?</li> <li>• How did you know where to go for the vaccination? How did you book an appointment and fit it into your plans? What other things were competing for your time?</li> <li>• Before you were vaccinated, do you remember any times when you thought about or started the process towards being vaccinated but didn't end up getting vaccinated? (vaccinated)</li> <li>• Of all of those things, which would you say was the most important thing that led to you not getting vaccinated? And why is that? And the second most important thing? And the third? (non-vaccinated)</li> </ul> |
| 5. Children's vaccinations                                   | <ul style="list-style-type: none"> <li>• In general, do you think people should vaccinate their children against tetanus? Why/why not?</li> <li>• And do you think people should vaccinate their children against flu? Why/why not?</li> </ul>                                                                                                                                                                                                                                                                                                                                                                                                                                                                                                                                                                                                                                                                                                   |
| 6. Factual knowledge on flu and tetanus and related vaccines | <ul style="list-style-type: none"> <li>• How much would you say you know about flu/tetanus? How serious or life-threatening do you think the disease is? In general, how likely do you think you are to catch the disease?</li> <li>• How much would you say you know about the vaccine for flu/tetanus? Do you happen to know how often it is recommended that you have it, or who it is recommended for?</li> </ul>                                                                                                                                                                                                                                                                                                                                                                                                                                                                                                                            |

### **Data analyses**

The recorded interviews are professionally transcribed and translated into English, and checked for accuracy by Ipsos MORI. To ensure reliability of coding and interpretation all the transcripts will be analysed by one academic researcher (AW) and 50% of the transcripts will be double-coded independently by a second researcher[33]. Differences will be resolved through dialogue until consensus is reached. Using thematic analysis, an initial categorising system will be developed based on the study objectives and the topics explored[34 35]. New themes and sub-themes emerging from the data analysis will be identified and included when consensus is reached regarding their relevance. A final thematic index will be produced to code all data – and verbatim quotes to support the extracted themes will be tabulated. Additionally, a journey to vaccination for flu and other for tetanus will be produced for each participant. Differences and commonalities emerging from these data will be identified and synthesised, and, if possible, typical journeys will be proposed.

### **Research team**

This is a collaborative study designed and undertaken by Imperial College London (academic partner), Sanofi Pasteur (commercial partner) and Ipsos MORI (market research partner). A steering group comprising Imperial College London senior researchers, Sanofi Pasteur directors and Ipsos MORI research directors provide on-going academic input, project management and strategic direction.

### **CONCLUSION**

Vaccination uptake is significantly influenced by a constellation of social and psychological factors. In order to capture these factors, and to understand their relative importance, we need to go beyond readily available, and in some cases, post-rationalised responses, and explore underlying motivations which may be driving vaccination behaviour. This study combines qualitative techniques, service design and psychology theories to develop the journey to vaccination, a new approach aimed at understanding vaccination decision-making processes across time. The journey to vaccination approach will allow us to explore how people's beliefs and attitudes towards vaccination are shaped



1  
2  
3 by their context and experiences, and to evaluate whether vaccination decision-making is driven by  
4  
5 heuristic judgement, logical analysis or both, and to what extent.  
6  
7

8  
9 The global scope of this research will allow us to perform cross cultural comparisons, which will in  
10  
11 turn shed light on key internal (e.g. beliefs, perceptions) and external (e.g. HCP advice, vaccine  
12  
13 availability, cost) stimuli which influence vaccination behaviour across different vaccines,  
14  
15 geographies and populations. Our findings can provide a deeper understanding of the barriers and  
16  
17 drivers to adult vaccination, which may in turn lead to more effective interventions.  
18  
19  
20  
21  
22  
23  
24  
25  
26  
27  
28  
29  
30  
31  
32  
33  
34  
35  
36  
37  
38  
39  
40  
41  
42  
43  
44  
45  
46  
47  
48  
49  
50  
51  
52  
53  
54  
55  
56  
57  
58  
59  
60

1  
2  
3  
4  
5  
6  
7  
8  
9  
10  
11  
12  
13  
14  
15  
16  
17  
18  
19  
20  
21  
22  
23  
24  
25  
26  
27  
28  
29  
30  
31  
32  
33  
34  
35  
36  
37  
38  
39  
40  
41  
42  
43  
44  
45  
46  
47  
48  
49  
50  
51  
52  
53  
54  
55  
56  
57  
58  
59  
60

**Figure 1.** The brand touchpoint wheel.

Source: Dunn & Davis (2003)[30]

**Figure 2.** Journey to vaccination

**Figure 3.** Example of a journey to flu non-vaccination

For peer review only

### Contributions

All the authors agree with the manuscript's contents. AW, NS and MM contributed to the design of the study and interview schedule. All authors contributed to the write-up.

### Funding and competing interests

AW and NS are funded by an unrestricted research grant from Sanofi Pasteur and also by the UK National Institute for Health Research (NIHR), via the Imperial College's Patient Safety Translational Research Centre ([www.cpssq.org](http://www.cpssq.org)). The views expressed are those of the authors and not necessarily those of the NIHR, the Department of Health or Sanofi Pasteur. The funders do not have any editorial control over the work reported in this article. The authors have no other relevant affiliations or financial involvement with any organisation or entity with a financial interest in or financial conflict with the subject matter or issues discussed in the manuscript, apart from those disclosed.

### Acknowledgements

We are very grateful to Bruno Rigole and Angus Thomson (Sanofi Pasteur), and Jonathan Nicholls, Helen Cox, Kate Duxbury, Gareth Turley, Reena Sangar and Rebecca Szyndler (Ipsos MORI), as well as the local research partners, for their valuable advice and management support throughout this study. The authors would also like to thank Marion Dolbeau (Sanofi Pasteur) for her contribution to the design and execution of this research.

**References**

1. UNICEF. Immunization: the big picture. Accessed on 1 July 2013. Available from:  
[http://www.unicef.org/immunization/index\\_bigpicture.html](http://www.unicef.org/immunization/index_bigpicture.html).
2. WHO, UNICEF. Global immunization vision and strategy 2006-2015. Geneva, Switzerland, 2005.
3. Zhang J, While AE, Norman IJ. Nurses' knowledge and risk perception towards seasonal influenza and vaccination and their vaccination behaviours: A cross-sectional survey. *Int J Nurs Stud* 2011;**48**(10):1281-89
4. Centers for Disease Control and Prevention. Recommended Adult Immunization Schedule — United States, 2012. *MMWR* 2012;**61**(04):1-7
5. Ghendon Y. Influenza--its impact and control. *World Health Stat Q* 1992;**45**(2-3):306-11
6. Nennig M, Shinefield HR, Edwards KM, Black SB, Fireman BH. Prevalence and incidence of adult pertussis in an urban population. *JAMA* 1996;**275**(21):1672-74
7. WHO. Vaccine-preventable diseases: monitoring system 2010 global summary. Accessed on 1 July 2013. Available from: [http://whqlibdoc.who.int/hq/2010/WHO\\_IVB\\_2010\\_eng.pdf](http://whqlibdoc.who.int/hq/2010/WHO_IVB_2010_eng.pdf).
8. Kohlhammer Y, Schnoor M, Schwartz M, Raspe H, Schäfer T. Determinants of influenza and pneumococcal vaccination in elderly people: a systematic review. *Public Health* 2007;**121**(10):742-51
9. Wheelock A, Thomson A, Sevdalis N. Social and psychological factors underlying adult vaccination behavior: lessons from seasonal influenza vaccination in the US and the UK. *Expert Rev Vaccines* 2013:1-9
10. NVAC. NVAC Vaccine Hesitancy Working Group Charge. Accessed on 1 July 2013. Available from: <http://www.hhs.gov/nvpo/nvac/subgroups/nvac-vaccine-hesitancy-wgcharge.html>
11. Hunink MM. *Decision making in health and medicine: integrating evidence and values*: Cambridge University Press, 2001.
12. Serpell L, Green J. Parental decision-making in childhood vaccination. *Vaccine* 2006;**24**(19):4041-46
13. Lipkus IM, Samsa G, Rimer BK. General Performance on a Numeracy Scale among Highly Educated Samples. *Med Decis Making* 2001;**21**(1):37-44

- 1  
2  
3 14. Meehl PE. *Clinical versus statistical prediction: A theoretical analysis and review of the*  
4  
5 *literature*. Minnesota: University of Minnesota Press, 1954.  
6
- 7 15. Simon H. *Models of man: Social and rational*. New York: Wiley.  
8
- 9 16. Kahneman D, Tversky A. On the Psychology of Prediction. *Psych Rev* 1973;**80**(4):237-51  
10
- 11 17. Kahneman D, Slovic P, Tversky A. *Judgment under uncertainty: Heuristics and biases*. New  
12  
13 York: Cambridge University Press, 1982.  
14
- 15 18. De Martino B, Kumaran D, Seymour B, Dolan RJ. Frames, biases, and rational decision-making  
16  
17 in the human brain. *Science* 2006;**313**(5787):684-87  
18
- 19 19. Evans MR, Prout H, Prior L, Tapper-Jones LM, Butler CC. A qualitative study of lay beliefs about  
20  
21 influenza immunisation in older people. *Brit J Gen Pract* 2007;**57**(538):352  
22
- 23 20. Kwong EW-y, Pang SM-c, Choi P-p, Wong TK-s. Influenza vaccine preference and uptake among  
24  
25 older people in nine countries. *J Adv Nurs* 2010;**66**(10):2297-308  
26
- 27 21. Telford R, Rogers A. What influences elderly peoples' decisions about whether to accept the  
28  
29 influenza vaccination? A qualitative study. *Health Educ Res* 2003;**18**(6):743-53  
30
- 31 22. Tversky A, Kahneman D. Availability: A heuristic for judging frequency and probability.  
32  
33 *Cognitive Psychol* 1973;**5**(2):207-32  
34
- 35 23. Kingman-Brundage J. Managing Services. Marketing, Operations, and Human Resources. In:  
36  
37 Lovelock CH, ed. *The ABCs of Service System Blueprinting*. New Jersey: Prentice-Hall  
38  
39 International, Inc, 1992:96-102.  
40
- 41 24. Shostack GL. Designing services that deliver. *Harvard bus rev* 1984;**62**(1):133-39  
42
- 43 25. Bitner MJ. Servicescapes: the impact of physical surroundings on customers and employees. *J*  
44  
45 *Marketing* 1992:57-71  
46
- 47 26. Tversky A, Kahneman D. Judgment under uncertainty: Heuristics and biases. *Science*  
48  
49 1974;**185**(4157):1124-31  
50
- 51 27. Evans JSB, Curtis-Holmes J. Rapid responding increases belief bias: Evidence for the dual-  
52  
53 process theory of reasoning. *Think Reasoning* 2005;**11**(4):382-89  
54
- 55 28. Haidt J. The emotional dog and its rational tail: a social intuitionist approach to moral judgment.  
56  
57 *Psychol Rev* 2001;**108**(4):814  
58  
59  
60

- 1  
2  
3 29. Wilson TD. *Strangers to ourselves: Discovering the adaptive unconscious*. Cambridge: Harvard  
4 University Press, 2009.  
5  
6  
7 30. Dunn M, Davis SM. *Building the brand-driven business. Operationalize your brand to drive*  
8 *profitable growth*. San Francisco: Tossey-Bass, 2002.  
9  
10  
11 31. Shaw C, Ivens J. *Building great customer experiences*: Palgrave Macmillan, 2002.  
12  
13 32. Reynolds TJ, Olson JC. *Understanding consumer decision making: the means-end approach to*  
14 *marketing and advertising strategy*. New Jersey: Psychology Press, 2001.  
15  
16  
17 33. Pope C, Ziebland S, Mays N. Analysing qualitative data. *BMJ* 2000;**320**(7227):114-16  
18  
19 34. Silverman D. *Interpreting qualitative data: methods for analyzing talk, text and interaction*.  
20 London: Sage, 2001.  
21  
22  
23 35. Flick U. *An introduction to qualitative research*. 4th ed. London: Sage, 2009.  
24  
25  
26  
27  
28  
29  
30  
31  
32  
33  
34  
35  
36  
37  
38  
39  
40  
41  
42  
43  
44  
45  
46  
47  
48  
49  
50  
51  
52  
53  
54  
55  
56  
57  
58  
59  
60

1  
2  
3  
4  
5  
6  
7  
8  
9  
10  
11  
12  
13  
14  
15  
16  
17  
18  
19  
20  
21  
22  
23  
24  
25  
26  
27  
28  
29  
30  
31  
32  
33  
34  
35  
36  
37  
38  
39  
40  
41  
42  
43  
44  
45  
46  
47  
48  
49  
50  
51  
52  
53  
54  
55  
56  
57  
58  
59  
60

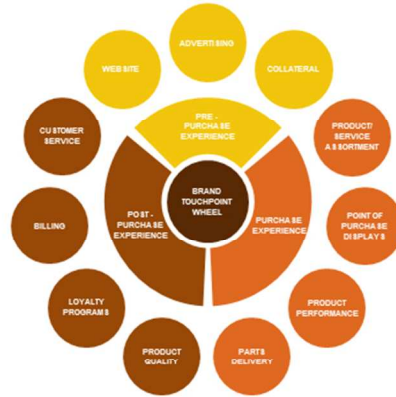

Figure 1. The brand touchpoint wheel.  
Source: Dunn & Davis (2003)[30]

190x275mm (96 x 96 DPI)

1  
2  
3  
4  
5  
6  
7  
8  
9  
10  
11  
12  
13  
14  
15  
16  
17  
18  
19  
20  
21  
22  
23  
24  
25  
26  
27  
28  
29  
30  
31  
32  
33  
34  
35  
36  
37  
38  
39  
40  
41  
42  
43  
44  
45  
46  
47  
48  
49  
50  
51  
52  
53  
54  
55  
56  
57  
58  
59  
60

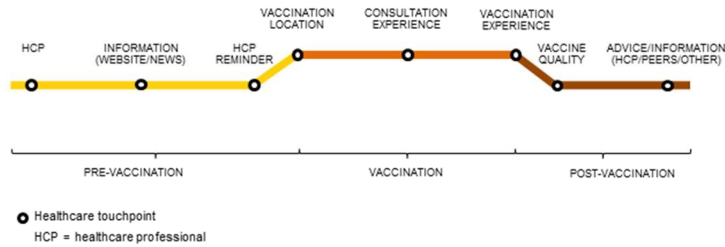

Figure 2. Journey to vaccination

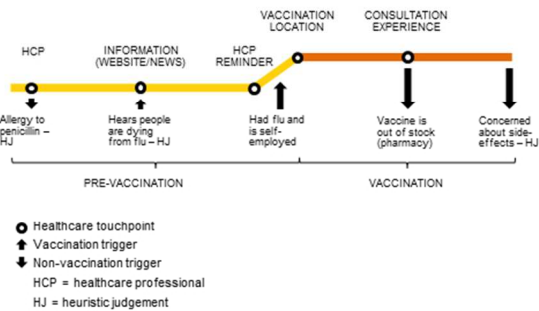

Figure 3. Example of a journey to flu non-vaccination

190x275mm (96 x 96 DPI)





**Journey to vaccination: a protocol for a multinational qualitative study**

|                                 |                                                                                                                                                                                                                                                                                                                      |
|---------------------------------|----------------------------------------------------------------------------------------------------------------------------------------------------------------------------------------------------------------------------------------------------------------------------------------------------------------------|
| Journal:                        | <i>BMJ Open</i>                                                                                                                                                                                                                                                                                                      |
| Manuscript ID:                  | bmjopen-2013-004279.R1                                                                                                                                                                                                                                                                                               |
| Article Type:                   | Protocol                                                                                                                                                                                                                                                                                                             |
| Date Submitted by the Author:   | 19-Dec-2013                                                                                                                                                                                                                                                                                                          |
| Complete List of Authors:       | Wheelock, Ana; Imperial College London, Surgery and Cancer<br>Miraldo, Marisa; Imperial College London, Business School<br>Parand, Anam; Imperial College London, Surgery and cancer<br>Vincent, Charles; Imperial College London, Surgery and Cancer<br>Sevdalis, Nick; Imperial College London, Surgery and Cancer |
| <b>Primary Subject Heading</b>: | Public health                                                                                                                                                                                                                                                                                                        |
| Secondary Subject Heading:      | Qualitative research, Infectious diseases                                                                                                                                                                                                                                                                            |
| Keywords:                       | PUBLIC HEALTH, QUALITATIVE RESEARCH, INFECTIOUS DISEASES                                                                                                                                                                                                                                                             |
|                                 |                                                                                                                                                                                                                                                                                                                      |

SCHOLARONE™  
Manuscripts

Peer Review Only

1  
2  
3 **JOURNEY TO VACCINATION: A PROTOCOL FOR A MULTINATIONAL**  
4 **QUALITATIVE STUDY**  
5  
6  
7

8  
9 Ana Wheelock, MSc<sup>1†</sup>; Marisa Miraldo, PhD<sup>2</sup>; Anam Parand, PhD<sup>1</sup>; Charles Vincent, PhD<sup>1</sup>; Nick  
10  
11 Sevdalis, PhD<sup>1</sup>  
12

13  
14  
15 <sup>1</sup>Faculty of Medicine, Imperial College London, UK; <sup>2</sup>Imperial College Business School  
16

17  
18  
19 †Corresponding author  
20

21  
22  
23 Imperial College London  
24

25 Medical School Building  
26

27 St Mary's Campus  
28

29 Norfolk Place  
30

31 London, W2 1PG  
32  
33

34  
35 Tel: 020 7594 3433  
36

37 [a.wheelock@imperial.ac.uk](mailto:a.wheelock@imperial.ac.uk)  
38  
39

40  
41 Word count: 4,301  
42

43  
44 Keywords – vaccine, influenza, tetanus, qualitative, social, psychological  
45  
46

47  
48 The Corresponding Author has the right to grant on behalf of all authors and does grant on behalf of  
49  
50 all authors, an exclusive licence (or non exclusive for government employees) on a worldwide basis to  
51  
52 the BMJ Publishing Group Ltd and its Licensees to permit this article (if accepted) to be published in  
53  
54 BMJ editions and any other BMJ PGL products and sublicences to exploit all subsidiary rights, as set  
55  
56 out in their licence (<http://resources.bmj.com/bmj/authors/checklists-forms/licence-for-publication>).  
57  
58  
59  
60

## ABSTRACT

**Introduction.** In the last two decades, childhood vaccination coverage has increased dramatically, averting an estimated 2 to 3 million deaths per year. Adult vaccination coverage, however, remains inconsistently recorded and substandard. Although structural barriers are known to limit coverage, social and psychological factors can also affect vaccine uptake. Previous qualitative studies have explored beliefs, attitudes and preferences associated with seasonal influenza (flu) vaccination uptake, yet little research has investigated how participants' context and experiences influence their vaccination decision-making process over time. This paper aims to provide a detailed account of a mixed methods approach designed to understand the wider constellation of social and psychological factors likely to influence adult vaccination decisions, as well as the context in which these decisions take place, in the US, the UK, France, India, China and Brazil.

**Methods and analysis.** We employ a combination of qualitative interviewing approaches to reach a comprehensive understanding of the factors influencing vaccination decisions, specifically seasonal flu and tetanus. To elicit these factors, we developed the journey to vaccination, a new qualitative approach anchored on the *heuristics and biases* tradition and the *customer journey mapping* approach. A purposive sampling strategy is used to select participants who represent a range of key socio-demographic characteristics. Thematic analysis will be used to analyse the data. Typical journeys to vaccination will be proposed.

**Ethics and dissemination.** Vaccination uptake is significantly influenced by social and psychological factors, some of which are underreported and poorly understood. This research will provide a deeper understanding of the barriers and drivers to adult vaccination. Our findings will be published in relevant peer-reviewed journals and presented at academic conferences. They will also be presented as practical recommendations at policy and industry meetings and healthcare professionals' forums. This research was approved by relevant local ethics committees.

## ARTICLE SUMMARY

### Article focus

A protocol of a mixed method qualitative study aiming to elicit underlying beliefs, attitudes and preferences affecting adult vaccination decisions.

### Key messages

- Vaccination decision-making is significantly influenced by social and psychological factors and often driven by intuition.
- People tend to fall back on readily available information and report post-decisional rationalisations of their behaviours rather than actual drivers, particularly when these are perceived to be unfounded.
- To better understand vaccination behaviour, we need to go beyond readily available responses and explore individuals' context, personal circumstances and past experiences, and how they influence vaccination decisions over time.

### Strengths and limitations of this study

- The *journey to vaccination*, a multidisciplinary qualitative approach, is used to elicit underlying beliefs, attitudes and preferences affecting vaccination decisions.
- A multinational and relevant sample population will be recruited.
- The interview schedules and local interviewers' training are standardised, which will enable data comparability.
- Challenges in recruiting specific participant categories may be encountered and cross-cultural variations will need to be documented and explained.

## BACKGROUND

In the last two decades, childhood vaccination coverage has increased dramatically, averting an estimated 2 to 3 million deaths per year, along with myriad episodes of illness and disability[1 2].

Adult vaccination coverage, however, remains poorly recorded and substandard[2 3].

Two important adult routine vaccines are seasonal influenza (flu) and tetanus containing vaccines[4]. An annual flu vaccine is recommended to all adults, particularly those aged  $\geq 65$  years and under 65s with certain medical conditions such as asthma, heart disease and diabetes. Despite this recommendation, in any given year flu epidemics can cause between 500,000 and 1,000,000 deaths globally[5]. A tetanus containing booster is recommended every ten years to prevent tetanus and other diseases such as pertussis, diphtheria and polio. Although tetanus morbidity and mortality is mostly neo-natal and maternal, globally, an estimated 13,000 annual non-maternal adults deaths are due to tetanus infection[6]. Moreover, it has been established that unvaccinated adolescents and adults, or those with waning immunity, have become a major source of pertussis infection for unvaccinated infants[7]. The World Health Organisation (WHO) estimated that in 2008, 195,000 children under 5 years of age died from pertussis and 199,000 from flu, many of whom were infected by an adult[8].

Although structural barriers, such as access to care and vaccine availability, are known to limit coverage, social and psychological factors can also affect vaccine uptake. For example, perceived susceptibility to flu and concerns about vaccine safety and effectiveness have been shown to significantly influence vaccination behaviour[9 10]. The relevance of these factors to vaccination decisions has become a focus of policy discussions, such that national and supranational immunisation advisory committees are now evaluating how to best measure confidence in vaccines to inform and evaluate future interventions[11].

Making decisions about our own health in general, and vaccinations in particular, can be a difficult task. Typically, it involves navigating an often intricate healthcare system, discussing the issue with a healthcare professional (HCP), researching the internet, consulting family members and peers, and

1  
2  
3 trying to make sense of all the available information, which is likely to be incomplete and  
4  
5 conflicting[12]. A key challenge in decision-making processes regarding health is weighing up the  
6  
7 benefits of an intervention versus its potential harm. In the case of vaccinations, this process can be  
8  
9 particularly complex as it often entails the assessment of several disease-related variables including  
10  
11 severity, likelihood of catching the pathogen and susceptibility to it, as well as vaccine attributes such  
12  
13 as effectiveness, side-effects and safety, among others[13]. Furthermore, the benefits and drawbacks  
14  
15 of vaccines are normally conveyed in statistical terms, a language that has proven to be difficult to  
16  
17 grasp for most people. For example, results from an experimental study showed that 16% to 20% of  
18  
19 highly educated participants incorrectly answered relatively simple questions about risk magnitudes  
20  
21 (e.g., which represents the larger risk: 1%, 5%, or 10%?)[14]. It is, therefore, conceivable that a  
22  
23 significantly larger proportion of less educated individuals, who constitute a majority of the  
24  
25 population, are likely to misunderstand this type of data.  
26  
27

28  
29 A vast body of research has demonstrated that when people are unable to assess risk using statistical  
30  
31 reasoning they often rely on heuristics, an experience-based and intuitive approach used to facilitate  
32  
33 decision-making[15-17]. Heuristics represent what psychologists have termed ‘cognitive shortcuts’, in  
34  
35 other words, they allow an inference to be made regarding risk without going through numerous  
36  
37 analytical calculations. By its very nature, the use of heuristics can be efficient and accurate in some  
38  
39 occasions, but it can also lead to cognitive errors and flawed decision making when used in  
40  
41 circumstances that require thorough logical analysis[18]. Furthermore, individuals’ judgement is often  
42  
43 influenced by their context and personal or family experiences, whether these are conscious or  
44  
45 not[19]. Health decisions in general, and vaccination decisions in particular, can also be significantly  
46  
47 influenced by patients’ trust in HCPs and the latter’s ability to communicate risk effectively[20].  
48  
49

50  
51 Although qualitative studies have explored beliefs, attitudes and preferences associated with flu  
52  
53 vaccination uptake, thus far, little research has investigated how participants’ own context and  
54  
55 experiences influence their vaccination decision-making process over time[21-23]. Furthermore, most  
56  
57 studies focus on populations from developed countries; relevant evidence from developing countries  
58  
59  
60

1  
2  
3 is largely missing. Qualitative research on adult tetanus boosters is limited and focuses on neonatal  
4  
5 tetanus.  
6  
7

8  
9 This article aims to provide a detailed account of a mixed method qualitative approach designed to  
10  
11 understand the wider constellation of social and psychological factors likely to influence adult  
12  
13 vaccination behaviour, and their relative importance, as well as the context in which these decisions  
14  
15 take place. Our focus is on social influences, beliefs and attitudes affecting the uptake of seasonal flu  
16  
17 vaccines and tetanus boosters, as these aspects have been found to be particularly influential in  
18  
19 vaccination decision-making. Our research will be conducted in key developed and developing  
20  
21 economies – US, UK, France, India, China and Brazil.  
22  
23

## 24 25 **CONCEPTUAL FRAMEWORK** 26

27 Our research sits well within the constructivist (or interpretivist) paradigm, which is concerned with  
28  
29 people's experiences from the perspective of those who live them, and whereby the researcher and  
30  
31 participant “jointly create findings from their interactive dialogue and interpretation”[24]. From an  
32  
33 epistemological point of view, however, our position draws from both constructivism and positivism,  
34  
35 in that we recognise there is a degree of bias introduced by the researcher's experience when creating  
36  
37 knowledge, but the researcher will endeavour to be objective and to elicit the participant's experience  
38  
39 in an unprejudiced manner[25].  
40  
41

42  
43 The methodology of this study rests on two theoretical approaches: *heuristics and biases*, specifically  
44  
45 the *availability* heuristic[26], and *customer journey mapping*[27-29]. We explain these below.  
46  
47

48  
49 As mentioned in the previous section, people rely on a limited number of heuristics which reduce the  
50  
51 complexity of calculating probabilities and predicting outcomes to simpler mental operations. A  
52  
53 frequently used heuristic is availability, the tendency to make judgements about the frequency or  
54  
55 probability of an event based on the ease with which a similar episode can be recalled[30]. The use of  
56  
57 this heuristic could yield accurate actions but it could also lead to erroneous decisions. For example, a  
58  
59  
60

1  
2  
3 high-risk individual may be prompted to have a flu vaccine after being exposed to extensive media  
4 coverage about one single flu-related death. The following season, he may decide not to have the flu  
5 vaccine due to a friend experiencing side-effects (e.g. flu-like symptoms) after receiving a flu vaccine.  
6  
7 In both cases, his decision-making is determined by the ease with which the risks associated with flu  
8 or the flu vaccine spring to mind (which vary between the two seasons), as opposed to the statistical  
9 probability of experiencing either adverse effect (which may be constant across the two seasons). The  
10 first decision, however, is aligned with current vaccination recommendations, whereas the second is  
11 not.  
12  
13  
14  
15  
16  
17  
18  
19

20  
21 Additionally, it has been established that people's evaluation of the logical strength of an argument is  
22 often biased by their pre-existent belief in the truth or falsity of the conclusion[31]. For example, if  
23 the same high-risk individual distrusts the medical establishment and the pharmaceutical industry and  
24 prefers alternative medicine instead, it is likely that the news about a flu-related death will have a  
25 lesser impact on his vaccination decision than his friend's reported side-effects – due to mentally  
26 over-weighting the vaccine adverse effects, which are consistent with his pre-existing beliefs.  
27  
28 Importantly, belief-based decision-making need not be conscious[32 33]. Thus, a decision based on  
29 intuition may be later post-rationalised and explained using analytical-sounding arguments, when in  
30 reality cost-benefit analysis was not employed.  
31  
32  
33  
34  
35  
36  
37  
38  
39

40  
41 The customer journey mapping approach is commonly used in service design to capture and evaluate  
42 people's experience of different services. Although some elements may be more important than  
43 others, this approach considers the overall experience of the service user as the result of every element  
44 in a journey through a service. The customer journey mapping approach has been mainly used by the  
45 transport and tourism industries, yet it has also enabled health providers to improve their services by  
46 uncovering key areas which deserve attention and focus improvement efforts on such areas[34]. Of  
47 particular note is the *brand touchpoint wheel* developed a decade ago by Dunn and Davies[35]. This  
48 conceives the customer journey as a wheel comprised of three main stages (pre-purchase, purchase  
49  
50  
51  
52  
53  
54  
55  
56  
57  
58  
59  
60



1  
2  
3 and post-purchase experience) and a number of *touchpoints*, which are key points at which the  
4  
5 consumer interacts with a particular product or service (see Fig. 1).  
6  
7

### 8 9 **Our approach: *journey to vaccination***

10  
11 Most qualitative studies in the field of vaccination decision-making have elicited barriers and enablers  
12  
13 to vaccination using traditional methodological approaches such as explicit enquiry (e.g. why did you  
14  
15 vaccinate?) and indiscriminate use of probes, often within a focus group setting. A key shortcoming of  
16  
17 these approaches is that the impact of individuals' personal circumstances and past experiences on  
18  
19 vaccination decisions over time is seldom explored. Thus, researchers may fail to notice participants'  
20  
21 tendency to fall back on readily available information and report post-decisional rationalisations of  
22  
23 their behaviours rather than actual drivers.  
24  
25

26  
27 In an effort to address these shortcomings, we developed a new qualitative approach which we call  
28  
29 *journey to vaccination*. Anchored on the two complementary lines of thought described above and  
30  
31 nested within the qualitative research tradition, journey to vaccination is a visual exercise in which the  
32  
33 interviewer and the participant jointly build a timeline that captures salient events that led the  
34  
35 participant to get or not to get vaccinated. The exercise starts with a participant's latest flu or tetanus  
36  
37 vaccination experience as an adult; it then extends backwards to the participant's first memory of such  
38  
39 experience. The participant is asked to describe these events, which in turn allows the interviewer to  
40  
41 indirectly elicit a range of factors that affected positively or negatively the decision to get vaccinated.  
42  
43 Importantly, this exercise enables the participant to produce a personal historical narrative, through  
44  
45 which vaccination decisions are discussed as a continuum and not in isolation from each other or from  
46  
47 other important health, or lifestyle-related decisions.  
48  
49

50  
51 The journey to vaccination approach is designed to comprehensively capture psychological but also  
52  
53 social influences on vaccination decisions. Participants are, therefore, asked to recall key actors who  
54  
55 were involved in the vaccination process (e.g. their family) and how they influenced the process.  
56  
57 Emotional aspects of the decision-making are also explored and taken into account.  
58  
59  
60

1  
2  
3  
4  
5 Based on the customer journey mapping approach described earlier and previous evidence on  
6  
7 vaccination behaviour, we envisage a journey to vaccination to be comprised of three stages and a  
8  
9 number of touchpoints at which the individual interacts with related health services (Figure 2): 1) pre-  
10  
11 vaccination period (appointment with HCP, information – websites, news, vaccination campaigns,  
12  
13 peers – and HCP reminders); 2) the vaccination experience itself (location, consultation experience  
14  
15 and vaccination experience); and 3) a post-vaccination experience (vaccine quality – e.g. side-effects,  
16  
17 effectiveness – and post-vaccination advice or information – from HCP, peers and other sources)[10  
18  
19 35 36]. An important component of a journey to vaccination is a cue to action or trigger, which  
20  
21 consists of an internal or external stimulus (e.g. salient health related experiences, advice from a  
22  
23 relative) that prompts individuals to vaccinate or not to vaccinate. Existing evidence suggests that  
24  
25 vaccination triggers may usually take place during the pre-vaccination stage and could sometimes  
26  
27 overlap with vaccination touchpoints[10]. For example, a vaccination reminder letter from the general  
28  
29 practitioner would be both a trigger and a touchpoint, if participants explicitly mention that the letter  
30  
31 prompted them to vaccinate.  
32

33  
34  
35 Figure 3 illustrates a journey to flu non-vaccination of a participant from the UK pilot (see Procedure  
36  
37 section below) who is not at high-risk (i.e. not eligible for free vaccination). The participant  
38  
39 mentioned that an allergy to penicillin discovered when he was younger, which his doctor refused to  
40  
41 acknowledge, had made him anxious about other medications' side-effects, including vaccines. This  
42  
43 was recorded as the first relevant touchpoint and trigger away from vaccination. He then pointed out  
44  
45 that some time ago he had heard on the news there had been flu-related deaths, and that this had been  
46  
47 a cause for concern which made him consider having a flu shot (another touchpoint and trigger to  
48  
49 vaccination). Subsequently, he recalled having the flu and worrying about the consequences of being  
50  
51 out of work due to his self-employed status (trigger to vaccination). The participant then reported that  
52  
53 at that stage he had tried to get a flu vaccine at a pharmacy, but it was out of stock (touchpoint and  
54  
55 trigger away from vaccination). Finally, the participant remembered the vaccine could have side-  
56  
57 effects and decided to stop trying to get vaccinated (trigger away from vaccination). This journey,  
58  
59  
60

1  
2  
3 therefore, does not include a post-vaccination stage. Importantly, analysis of the participant's account  
4  
5 of his journey to non-vaccination indicates a tendency to make decisions based on heuristics rather  
6  
7 than logical analyses. For example, the participant's motivation to have a flu shot after hearing on the  
8  
9 news about flu-related deaths was based on the mental availability of this piece of information and not  
10  
11 his actual risk of death from flu.  
12

## 13 14 15 **STUDY AIMS**

16  
17 The primary aim of this study is to gain deeper understanding of the social and psychological factors  
18  
19 influencing the uptake of two different adult vaccines across key high and middle-income countries  
20  
21 with diverse healthcare systems: The US, the UK, France, India, China and Brazil. Specifically, we  
22  
23 are interested in exploring how people's experiences shape their beliefs, attitudes and behaviour  
24  
25 towards vaccines. A secondary objective is to develop more effective methods to elicit such data.  
26  
27

## 28 29 **METHODS**

### 30 31 **Setting**

32  
33 This research is conducted in six countries, in urban, sparsely populated towns and rural areas of the  
34  
35 following states or regions: New York, New Jersey and Illinois (US); West Midlands, London and  
36  
37 South East (UK); Nord Pas-de-Calais and Île-de-France (France); Maharashtra and Karnataka (India);  
38  
39 Shanghai and Guangzhou (China); and São Paulo and Rio de Janeiro (Brazil).  
40  
41

### 42 43 **Sampling and recruitment**

44  
45 A purposive sampling strategy is used to select adult participants who are both vaccinated and not  
46  
47 vaccinated against flu and tetanus and represented a range of socio-demographic characteristics  
48  
49 associated with vaccination uptake, notably age and health status (see Table 1). In an effort to reduce  
50  
51 recall bias[11], only those who have been vaccinated in the past 12 months are eligible to participate.  
52  
53 Potential participants are selected at random from current telephone directories. For consistency, a  
54  
55 minimum of 20 participants are recruited per country, an acceptable sample size for a qualitative  
56  
57 study[37].  
58  
59  
60

**Table 1. Purposive sampling strategy**

| KEY DEMOGRAPHIC CHARACTERISTICS            | Minimum participant quota per country |
|--------------------------------------------|---------------------------------------|
| Eligible chronic condition*                | 7 with                                |
|                                            | 7 without                             |
| Gender                                     | 8 female                              |
|                                            | 8 male                                |
| Parent/Guardian of child/children under 18 | 4 mothers                             |
|                                            | 4 fathers                             |
| Age                                        | 8 18-49                               |
|                                            | 4 50-64                               |
|                                            | 6 ≥65                                 |
| Socio-economic group (social grade)**      | 7 ABC1                                |
|                                            | 7 C2DE                                |
| Adults who have had ONE of the vaccines    | 4 flu                                 |
|                                            | 3 tetanus                             |
| Have had both tetanus and flu vaccines     | 6                                     |
| Have not had either vaccination            | 6                                     |
| Urban/rural***                             | 5                                     |
| <b>TOTAL</b>                               | <b>20</b>                             |

\*These include asthma, obstructive pulmonary disease (COPD) or bronchitis, heart disease, kidney disease, liver disease, neurological conditions, weakened immune system due to conditions such as HIV and AIDS, or as a result of medication such as steroid tablets or chemotherapy. \*\*A = higher socio-economic group and E = lower socioeconomic group. We used country-specific occupation and income data to determine participants' social grade. \*\*\*The urban/rural quotas for UK and France were relaxed due to the quality and coverage of their public health systems.

We prioritise unvaccinated participants who state that they will either definitely or probably get vaccinated against flu or tetanus “one day” or that they will probably not get vaccinated against flu or tetanus, as these attitudes are representative of the majority of the non-vaccinated population[38]. This is done via the following screening question at the time of recruitment: “Which of the following statements most closely reflects your attitude to the flu and tetanus vaccinations? 1) I will definitely get vaccinated against flu or tetanus one day; 2) I will probably get vaccinated against get vaccinated against flu or tetanus one day; 3) I will probably not get vaccinated against flu or tetanus; 4) I will definitely not get vaccinated against flu or tetanus”.

### Procedure

The data collection is carried out jointly by the first author (UK and US) and Ipsos MORI, a multinational market research firm and their associates. Interviewers have been trained either face-to-face or via teleconference (US) by Ipsos MORI researchers. They have also been provided with a

1  
2  
3 manual containing detailed interview instructions. Interview guides and materials have been translated  
4  
5 into French (France), Hindi, Marathi and Kannada (India), Chinese (China) and Portuguese (Brazil)  
6  
7 by the local research teams. Interviews are carried out by trained interviewers from Imperial College  
8  
9 London, the market research company Ipsos MORI or their local associates. Participants are  
10  
11 interviewed face-to-face in their native language for approximately 60 minutes at home or a central  
12  
13 interviewing facility and interviews are digitally recorded. Participants are fully informed about the  
14  
15 study via a participant information sheet. Written consent is obtained and each participant receives an  
16  
17 equivalent of £11-£78 incentive, depending upon the country and location of the interview, in return  
18  
19 for their time. Before commencing each interview, participants are reminded about the strict  
20  
21 confidentiality of their responses.  
22

23  
24  
25 A pre-pilot was conducted with N = 4 (two researchers from Imperial College London and two from  
26  
27 Ipsos MORI not involved in the present study) to test duration and flow of the interview.  
28

29  
30 Consequently, the interview guide was simplified and shortened. These interviews will not be  
31  
32 included in the final sample for analysis. A piloting technique was subsequently used for the first  
33  
34 three interviews in the UK, whereby the research team observed each interview behind a one-way  
35  
36 mirror and evaluated its quality in real-time. At the end of the session, minor amendments to the  
37  
38 interview guide were agreed and the final interview materials produced.  
39

40  
41 We use two semi-structured and probing interview schedules, one for vaccinated and one for non-  
42  
43 vaccinated participants, constructed through expert consultations and a literature review[10] (See  
44  
45 Table 2). We employ a combination of interviewing techniques to reach a comprehensive  
46  
47 understanding of the factors underpinning vaccination decisions. The schedule comprises six sections  
48  
49 – as follows:  
50

51  
52  
53 Section 1 aims to obtain an overview of participants' life and values, to build rapport and to identify  
54  
55 important issues to assist with probing throughout the interview.  
56  
57  
58  
59  
60

1  
2  
3 Section 2 aims to elicit participants' general information-seeking behaviours and influences. We  
4 explore information sources (e.g. media, family, peers, etc.) through which people's knowledge about  
5 and attitudes towards vaccines may be formed.  
6  
7  
8  
9

10  
11 Section 3 examines participants' views towards health, HCPs and adult vaccines. This section aims to  
12 understand how people's perceptions towards their own health and their relationship with HCPs  
13 influence their stance on vaccines. General views on adult vaccines are evaluated by asking  
14 participants to arrange five adult vaccinations (flu, tetanus, pneumonia, hepatitis and measles, mumps  
15 and rubella (MMR)) into one or more groups. By identifying how people group vaccines, and the  
16 reasons for their groupings, we aim to contextualise and gain deeper understanding of their views on  
17 flu vaccines and tetanus containing boosters.  
18  
19  
20  
21  
22  
23  
24

25  
26  
27 Section 4 explores participants' journeys to vaccination (or non-vaccination) for both flu vaccines and  
28 tetanus containing boosters. We aim to undertake an in-depth exploration of the vaccination decision-  
29 making process by identifying important aspects that lead people to vaccinate or not to vaccinate.  
30  
31  
32  
33  
34

35  
36 In an effort to circumvent availability bias, we avoid asking direct questions such as 'why did you  
37 have a flu shot?' Instead, we explore the set of circumstances and emotions that drive participants to  
38 accept or refuse vaccination, aided by an elicitation technique called *laddering*, which provides a  
39 simple and systematic way of establishing people's core values and beliefs, and the linkages between  
40 these and key behaviours, in this case, vaccination[39]. To minimise post-rationalisation, we do not  
41 use probes in this section of the interview.  
42  
43  
44  
45  
46  
47  
48

49  
50 Section 5 of the interview examines participants' attitudes toward children's vaccinations. We aim to  
51 understand whether people's views about adult vaccines correspond with their views about children's  
52 and how.  
53  
54  
55  
56  
57  
58  
59  
60

Finally, in section 6 we explore participants' knowledge of the two diseases and vaccines (i.e. flu and tetanus) to understand to what extent their decision-making is influenced by facts.

Key socio-demographic information is collected at the end of the interview – including employment status, occupation, health insurance, perceived ability to afford essential goods, level of education, marital status, religion and ethnicity.

**Table 2. Interview schedule**

| Interview topic (sections 1-6)                   | Key interview questions                                                                                                                                                                                                                                                                                                                                                                                                                                                                                                                                                                                                                                                                                                                                                                                                                                                                                                         |
|--------------------------------------------------|---------------------------------------------------------------------------------------------------------------------------------------------------------------------------------------------------------------------------------------------------------------------------------------------------------------------------------------------------------------------------------------------------------------------------------------------------------------------------------------------------------------------------------------------------------------------------------------------------------------------------------------------------------------------------------------------------------------------------------------------------------------------------------------------------------------------------------------------------------------------------------------------------------------------------------|
| 1. Overview of life and values                   | <ul style="list-style-type: none"> <li>• Tell me about yourself and your life, for example, what you spend your time doing and how you enjoy yourself.</li> <li>• What sorts of things do you worry about?</li> </ul>                                                                                                                                                                                                                                                                                                                                                                                                                                                                                                                                                                                                                                                                                                           |
| 2. Information seeking behaviours and influences | <ul style="list-style-type: none"> <li>• Can you tell me how you find out what is happening generally in the world?</li> <li>• And who are the people whose opinion you value or with whom you discuss important issues with? And why is that?</li> </ul>                                                                                                                                                                                                                                                                                                                                                                                                                                                                                                                                                                                                                                                                       |
| 3. Views about health and vaccinations           | <ul style="list-style-type: none"> <li>• Can I ask how you feel your own health is?</li> <li>• When you think about your health, what are all the things that come to mind? Do you do anything to keep healthy? What sorts of things?</li> <li>• Which doctors or nurses do you particularly trust and listen to, if any? And why is that? Why is that important to you?</li> <li>• Thinking now about vaccinations, what are all the things that come to mind when you think about vaccinations?</li> <li>• Looking at these cards, which are all adult vaccinations, please can you sort them into groups?</li> </ul>                                                                                                                                                                                                                                                                                                         |
| 4. Journey to vaccination (or non-vaccination)   | <ul style="list-style-type: none"> <li>• How would you describe to a friend how you came to have (or not to have) the vaccination? What things happened that meant you ended up getting (or not getting) vaccinated?</li> <li>• What would you say happened at that point that triggered that change (or decision)? And why was that important?</li> <li>• How did you know where to go for the vaccination? How did you book an appointment and fit it into your plans? What other things were competing for your time?</li> <li>• Before you were vaccinated, do you remember any times when you thought about or started the process towards being vaccinated but didn't end up getting vaccinated? (vaccinated)</li> <li>• Of all of those things, which would you say was the most important thing that led to you not getting vaccinated? And why is that? And the second most important thing? And the third?</li> </ul> |

|                                                              |                                                                                                                                                                                     |
|--------------------------------------------------------------|-------------------------------------------------------------------------------------------------------------------------------------------------------------------------------------|
|                                                              | (non-vaccinated)                                                                                                                                                                    |
| 5. Children's vaccinations                                   | • In general, do you think people should vaccinate their children against tetanus? Why/why not?                                                                                     |
|                                                              | • And do you think people should vaccinate their children against flu? Why/why not?                                                                                                 |
| 6. Factual knowledge on flu and tetanus and related vaccines | • How much would you say you know about flu/tetanus? How serious or life-threatening do you think the disease is? In general, how likely do you think you are to catch the disease? |
|                                                              | • How much would you say you know about the vaccine for flu/tetanus? Do you happen to know how often it is recommended that you have it, or who it is recommended for?              |

### Data analyses

The recorded interviews are professionally transcribed and translated into English, and checked for accuracy by Ipsos MORI. To ensure reliability of coding and interpretation all the transcripts will be analysed by one academic researcher (AW) and 50% of the transcripts will be analysed independently by a second researcher[40]. Differences will be resolved through dialogue until consensus is reached.

Using thematic analysis, an initial categorising system will be developed based on the study objectives and the topics explored[41 42]. New themes and sub-themes emerging from the data analysis will be identified and included when consensus is reached regarding their relevance. A final thematic index will be produced to code all data – and verbatim quotes to support the extracted themes will be tabulated. Additionally, a journey to vaccination for flu and other for tetanus will be produced for each participant. Differences and commonalities emerging from these data will be identified and synthesised, and, if possible, typical journeys will be proposed.

### Ethics and dissemination

This is a collaborative study designed and undertaken by Imperial College London (academic partner), Sanofi Pasteur (commercial partner) and Ipsos MORI (market research partner). A steering group comprising Imperial College London senior researchers, Sanofi Pasteur directors and Ipsos MORI research directors provide on-going academic input, project management and strategic direction.



Ipsos MORI follows the European Society of Market Research Organisations (ESOMAR) Code of Conduct for international fieldwork. This research is also carried out in accordance with the requirements of the international quality standard for market research, ISO 20252:2006, International general company standard ISO 9001:2008 and International standard for information security ISO 27001:2005. Additionally, this study was approved by Imperial College Research Ethical Committee (ICREC) in the UK, American Institutes for Research (AIR) in the US, Commission nationale de l'informatique et des libertés (CNIL) and Comité de protection des personnes "Ile-de-France III" in France, Safe Search Independent Ethics Committee in India, Shanghai Clinical Research Center in China and Comissão Nacional de Ética em Pesquisa (CONEP) in Brazil.

The nature of the research topic and the sample (general population) make this study one with few ethical issues. However, we recognise that all subjects should be willing and able to participate in this study and that there is a small possibility that respondents may disclose information that could potentially cause psychological distress for the individual if the purposes of the research are misunderstood. To address these issues, all participants are informed about the purposes of the research and written consent is obtained from the participants prior to their involvement in the study. Furthermore, when designing the interview schedule, there has been due consideration to the phrasing of the questions so as not to attribute blame, for example, for not carrying out responsible duties associated with participants' own health or that of the general public.

Our findings will be disseminated to relevant policy, industry, clinical and academic audiences through different outlets. These will be presented as practical recommendations at policy and industry meetings and healthcare professionals' forums. Our results will also be presented at academic conferences and published in peer-reviewed journals.

## CONCLUSION

Vaccination uptake is significantly influenced by a constellation of social and psychological factors. In order to capture these factors, and to understand their relative importance, we need to go beyond

1  
2  
3 readily available, and in some cases, post-rationalised responses, and explore underlying motivations  
4 which may be driving vaccination behaviour. This study combines qualitative techniques, service  
5 design and psychology theories to develop the journey to vaccination, a new approach aimed at  
6 understanding vaccination decision-making processes across time. The journey to vaccination  
7 approach will allow us to explore how people's beliefs and attitudes towards vaccination are shaped  
8 by their context and experiences, and to evaluate whether vaccination decision-making is driven by  
9 heuristic judgement, logical analysis or both, and to what extent.  
10  
11  
12  
13  
14  
15  
16  
17  
18

19 The global scope of this research will allow us to perform cross cultural comparisons, which will in  
20 turn shed light on key internal (e.g. beliefs, perceptions) and external (e.g. HCP advice, vaccine  
21 availability, cost) stimuli which influence vaccination behaviour across different vaccines,  
22 geographies and populations. Our findings can provide a deeper understanding of the barriers and  
23 drivers to adult vaccination, which may in turn lead to more effective interventions.  
24  
25  
26  
27  
28  
29  
30  
31  
32  
33  
34  
35  
36  
37  
38  
39  
40  
41  
42  
43  
44  
45  
46  
47  
48  
49  
50  
51  
52  
53  
54  
55  
56  
57  
58  
59  
60

1  
2  
3 **Figure 1.** The brand touchpoint wheel.

4 Source: Dunn & Davis (2003)[35]  
5  
6  
7

8 **Figure 2.** Journey to vaccination  
9  
10

11 **Figure 3.** Example of a journey to flu non-vaccination  
12  
13  
14  
15  
16  
17  
18  
19  
20  
21  
22  
23  
24  
25  
26  
27  
28  
29  
30  
31  
32  
33  
34  
35  
36  
37  
38  
39  
40  
41  
42  
43  
44  
45  
46  
47  
48  
49  
50  
51  
52  
53  
54  
55  
56  
57  
58  
59  
60

For peer review only

### Contributions

All the authors agree with the manuscript's contents. AW, NS and MM contributed to the design of the study and interview schedule. All authors contributed to the write-up.

### Funding and competing interests

AW and NS are funded by an unrestricted research grant from Sanofi Pasteur and also by the UK National Institute for Health Research (NIHR), via the Imperial College's Patient Safety Translational Research Centre ([www.cpssq.org](http://www.cpssq.org)). The fieldwork and associated research costs are funded by Sanofi Pasteur. The views expressed are those of the authors and not necessarily those of the NIHR, the Department of Health or Sanofi Pasteur. The funders do not have any editorial control over the work reported in this article. The authors have no other relevant affiliations or financial involvement with any organisation or entity with a financial interest in or financial conflict with the subject matter or issues discussed in the manuscript, apart from those disclosed.

### Acknowledgements

We are very grateful to Bruno Rigole and Angus Thomson (Sanofi Pasteur), and Jonathan Nicholls, Helen Cox, Kate Duxbury, Gareth Turley, Reena Sangar and Rebecca Szyndler (Ipsos MORI), as well as the local research partners, for their valuable advice and management support throughout this study. The authors would also like to thank Marion Dolbeau (Sanofi Pasteur) for her contribution to the design and execution of this research.

## References

1. UNICEF. Immunization: the big picture. Accessed on 1 July 2013. Available from:  
[http://www.unicef.org/immunization/index\\_bigpicture.html](http://www.unicef.org/immunization/index_bigpicture.html).
2. WHO, UNICEF. Global immunization vision and strategy 2006-2015. Geneva, Switzerland, 2005.
3. Zhang J, While AE, Norman IJ. Nurses' knowledge and risk perception towards seasonal influenza and vaccination and their vaccination behaviours: A cross-sectional survey. *Int J Nurs Stud* 2011;**48**(10):1281-89.
4. Centers for Disease Control and Prevention. Recommended Adult Immunization Schedule — United States, 2012. *MMWR* 2012;**61**(04):1-7.
5. Ghendon Y. Influenza--its impact and control. *World Health Stat Q* 1992;**45**(2-3):306-11
6. WHO. Tetanus vaccine. *Wkly Epidemiol Rec* 2006;**81**(1):197-208.
7. Nennig M, Shinefield HR, Edwards KM, et al. Prevalence and incidence of adult pertussis in an urban population. *JAMA* 1996;**275**(21):1672-74.
8. WHO. Vaccine-preventable diseases: monitoring system 2010 global summary. Accessed on 1 July 2013. Available from: [http://whqlibdoc.who.int/hq/2010/WHO\\_IVB\\_2010\\_eng.pdf](http://whqlibdoc.who.int/hq/2010/WHO_IVB_2010_eng.pdf).
9. Kohlhammer Y, Schnoor M, Schwartz M, et al. Determinants of influenza and pneumococcal vaccination in elderly people: a systematic review. *Public Health* 2007;**121**(10):742-51.
10. Wheelock A, Thomson A, Sevdalis N. Social and psychological factors underlying adult vaccination behavior: lessons from seasonal influenza vaccination in the US and the UK. *Expert Rev Vaccines* 2013:1-9.
11. NVAC. NVAC Vaccine Hesitancy Working Group Charge. Accessed on 1 July 2013. Available from: <http://www.hhs.gov/nvpo/nvac/subgroups/nvac-vaccine-hesitancy-wgcharge.html>.
12. Hunink MM. *Decision making in health and medicine: integrating evidence and values*: Cambridge University Press, 2001.
13. Serpell L, Green J. Parental decision-making in childhood vaccination. *Vaccine* 2006;**24**(19):4041-46.
14. Lipkus IM, Samsa G, Rimer BK. General Performance on a Numeracy Scale among Highly Educated Samples. *Med Decis Making* 2001;**21**(1):37-44.

- 1  
2  
3 15. Meehl PE. *Clinical versus statistical prediction: A theoretical analysis and review of the*  
4  
5 *literature*. Minesota: University of Minesota Press, 1954.  
6
- 7 16. Simon H. *Models of man: Social and rational*. New York: Wiley.  
8
- 9 17. Kahneman D, Tversky A. On the Psychology of Prediction. *Psych Rev* 1973;**80**(4):237-51.  
10
- 11 18. Kahneman D, Slovic P, Tversky A. *Judgment under uncertainty: Heuristics and biases*. New  
12  
13 York: Cambridge University Press, 1982.  
14
- 15 19. De Martino B, Kumaran D, Seymour B, et al. Frames, biases, and rational decision-making in the  
16  
17 human brain. *Science* 2006;**313**(5787):684-87.  
18
- 19 20. Alaszewski A, Horlick-Jones T. How can doctors communicate information about risk more  
20  
21 effectively? *BMJ* 2003;**327**(7417):728.  
22
- 23 21. Evans MR, Prout H, Prior L, et al. A qualitative study of lay beliefs about influenza immunisation  
24  
25 in older people. *Brit J Gen Pract* 2007;**57**(538):352.  
26
- 27 22. Kwong EW-y, Pang SM-c, Choi P-p, et al. Influenza vaccine preference and uptake among older  
28  
29 people in nine countries. *J Adv Nurs* 2010;**66**(10):2297-308.  
30
- 31 23. Telford R, Rogers A. What influences elderly peoples' decisions about whether to accept the  
32  
33 influenza vaccination? A qualitative study. *Health Educ Res* 2003;**18**(6):743-53.  
34
- 35 24. Ponterotto JG. Qualitative research in counseling psychology: A primer on research paradigms  
36  
37 and philosophy of science. *J Couns Psychol* 2005;**52**(2):126.  
38
- 39 25. Sciarra D. The role of the qualitative researcher. In: Kopala M, Suzuki LA, eds. *Using qualitative*  
40  
41 *methods in psychology*. Thousand Oaks, CA: Sage, 1999:37-48.  
42
- 43 26. Tversky A, Kahneman D. Availability: A heuristic for judging frequency and probability.  
44  
45 *Cognitive Psychol* 1973;**5**(2):207-32.  
46
- 47 27. Kingman-Brundage J. The ABCs of Service System Blueprinting. In: Lovelock CH, ed. *Managing*  
48  
49 *Services: Marketing, Operations and Human Resources* New Jersey: Prentice-Hall  
50  
51 International, Inc, 1992:96-102.  
52
- 53 28. Shostack GL. Designing services that deliver. *Harvard bus rev* 1984;**62**(1):133-39.  
54
- 55 29. Bitner MJ. Servicescapes: the impact of physical surroundings on customers and employees. *J*  
56  
57 *Marketing* 1992:57-71.  
58  
59  
60

- 1  
2  
3 30. Tversky A, Kahneman D. Judgment under uncertainty: Heuristics and biases. *Science*  
4  
5 1974;**185**(4157):1124-31.  
6  
7 31. Evans JSB, Curtis-Holmes J. Rapid responding increases belief bias: Evidence for the dual-  
8  
9 process theory of reasoning. *Think Reasoning* 2005;**11**(4):382-89.  
10  
11 32. Haidt J. The emotional dog and its rational tail: a social intuitionist approach to moral judgment.  
12  
13 *Psychol Rev* 2001;**108**(4):814.  
14  
15 33. Wilson TD. *Strangers to ourselves: Discovering the adaptive unconscious*. Cambridge: Harvard  
16  
17 University Press, 2009.  
18  
19 34. Westbrook JI, Coiera EW, Gosling AS, et al. Critical incidents and journey mapping as  
20  
21 techniques to evaluate the impact of online evidence retrieval systems on health care delivery  
22  
23 and patient outcomes. *Int J Med Inform* 2007;**76**(2-3):234-45.  
24  
25 35. Dunn M, Davis SM. *Building the brand-driven business. Operationalize your brand to drive*  
26  
27 *profitable growth*. San Francisco: Tossey-Bass, 2002.  
28  
29 36. Shaw C, Ivens J. *Building great customer experiences*: Palgrave Macmillan, 2002.  
30  
31 37. Patton MQ. Qualitative Research. *Encyclopedia of Statistics in Behavioral Science*: John Wiley &  
32  
33 Sons, Ltd, 2005.  
34  
35 38. Leask J, Kinnersley P, Jackson C, et al. Communicating with parents about vaccination: a  
36  
37 framework for health professionals. *BMC pediatrics* 2012;**12**(1):154.  
38  
39 39. Reynolds TJ, Olson JC. *Understanding consumer decision making: the means-end approach to*  
40  
41 *marketing and advertising strategy*. New Jersey: Psychology Press, 2001.  
42  
43 40. Pope C, Ziebland S, Mays N. Analysing qualitative data. *BMJ* 2000;**320**(7227):114-16.  
44  
45 41. Silverman D. *Interpreting qualitative data: methods for analyzing talk, text and interaction*.  
46  
47 London: Sage, 2001.  
48  
49 42. Flick U. *An introduction to qualitative research*. 4th ed. London: Sage, 2009.  
50  
51  
52  
53  
54  
55  
56  
57  
58  
59  
60

1  
2  
3 **JOURNEY TO VACCINATION: A PROTOCOL FOR A MULTINATIONAL**  
4 **QUALITATIVE STUDY**  
5  
6  
7

8  
9 Ana Wheelock, MSc<sup>1†</sup>; Marisa Miraldo, PhD<sup>2</sup>; Anam Parand, PhD<sup>1</sup>; Charles Vincent, PhD<sup>1</sup>; Nick  
10  
11 Sevdalis, PhD<sup>1</sup>  
12

13  
14  
15 <sup>1</sup>Faculty of Medicine, Imperial College London, UK; <sup>2</sup>Imperial College Business School  
16

17  
18  
19 †Corresponding author  
20

21  
22  
23 Imperial College London  
24

25 Medical School Building  
26

27 St Mary's Campus  
28

29 Norfolk Place  
30

31 London, W2 1PG  
32  
33

34  
35 Tel: 020 7594 3433  
36

37 [a.wheelock@imperial.ac.uk](mailto:a.wheelock@imperial.ac.uk)  
38  
39

40  
41 **Word count: 4,301**  
42

43  
44 Keywords – vaccine, influenza, tetanus, qualitative, social, psychological  
45  
46

47  
48 The Corresponding Author has the right to grant on behalf of all authors and does grant on behalf of  
49 all authors, an exclusive licence (or non exclusive for government employees) on a worldwide basis to  
50 the BMJ Publishing Group Ltd and its Licensees to permit this article (if accepted) to be published in  
51 BMJ editions and any other BMJPG products and sublicences to exploit all subsidiary rights, as set  
52 out in their licence (<http://resources.bmj.com/bmj/authors/checklists-forms/licence-for-publication>).  
53  
54  
55  
56  
57  
58  
59  
60



**ABSTRACT**

**Introduction.** In the last two decades, childhood vaccination coverage has increased dramatically, averting an estimated 2 to 3 million deaths per year. Adult vaccination coverage, however, remains inconsistently recorded and substandard. Although structural barriers are known to limit coverage, social and psychological factors can also affect vaccine uptake. Previous qualitative studies have explored beliefs, attitudes and preferences associated with seasonal influenza (flu) vaccination uptake, yet little research has investigated how participants' context and experiences influence their vaccination decision-making process over time. This paper aims to provide a detailed account of a mixed methods approach designed to understand the wider constellation of social and psychological factors likely to influence adult vaccination decisions, as well as the context in which these decisions take place, in the US, the UK, France, India, China and Brazil.

**Methods and analysis.** We employ a combination of qualitative interviewing approaches to reach a comprehensive understanding of the factors influencing vaccination decisions, specifically seasonal flu and tetanus. To elicit these factors, we developed the journey to vaccination, a new qualitative approach anchored on the *heuristics and biases* tradition and the *customer journey mapping* approach. A purposive sampling strategy is used to select participants who represent a range of key socio-demographic characteristics. Thematic analysis will be used to analyse the data. Typical journeys to vaccination will be proposed.

**Ethics and dissemination.** Vaccination uptake is significantly influenced by social and psychological factors, some of which are underreported and poorly understood. This research will provide a deeper understanding of the barriers and drivers to adult vaccination. Our findings will be published in relevant peer-reviewed journals and presented at academic conferences. They will also be presented as practical recommendations at policy and industry meetings and healthcare professionals' forums. This research was approved by relevant local ethics committees.

## ARTICLE SUMMARY

### Article focus

A protocol of a mixed method qualitative study aiming to elicit underlying beliefs, attitudes and preferences affecting adult vaccination decisions.

### Key messages

- Vaccination decision-making is significantly influenced by social and psychological factors and often driven by intuition.
- People tend to fall back on readily available information and report post-decisional rationalisations of their behaviours rather than actual drivers, particularly when these are perceived to be unfounded.
- To better understand vaccination behaviour, we need to go beyond readily available responses and explore individuals' context, personal circumstances and past experiences, and how they influence vaccination decisions over time.

### Strengths and limitations of this study

- The *journey to vaccination*, a multidisciplinary qualitative approach, is used to elicit underlying beliefs, attitudes and preferences affecting vaccination decisions.
- A multinational and relevant sample population will be recruited.
- The interview schedules and local interviewers' training are standardised, which will enable data comparability.
- Challenges in recruiting specific participant categories may be encountered and cross-cultural variations will need to be documented and explained.

## BACKGROUND

In the last two decades, childhood vaccination coverage has increased dramatically, averting an estimated 2 to 3 million deaths per year, along with myriad episodes of illness and disability[1 2]. Adult vaccination coverage, however, remains poorly recorded and substandard[2 3].

Two important adult routine vaccines are seasonal influenza (flu) and tetanus containing vaccines[4]. An annual flu vaccine is recommended to all adults, particularly those aged  $\geq 65$  years and under 65s with certain medical conditions such as asthma, heart disease and diabetes. Despite this recommendation, in any given year flu epidemics can cause between 500,000 and 1,000,000 deaths globally[5]. A tetanus containing booster is recommended every ten years to prevent tetanus and other diseases such as pertussis, diphtheria and polio. Although tetanus morbidity and mortality is mostly neo-natal and maternal, globally, an estimated 13,000 annual non-maternal adults deaths are due to tetanus infection[6]. Moreover, it has been established that unvaccinated adolescents and adults, or those with waning immunity, have become a major source of pertussis infection for unvaccinated infants[7]. The World Health Organisation (WHO) estimated that in 2008, 195,000 children under 5 years of age died from pertussis and 199,000 from flu, many of whom were infected by an adult[8].

Although structural barriers, such as access to care and vaccine availability, are known to limit coverage, social and psychological factors can also affect vaccine uptake. For example, perceived susceptibility to flu and concerns about vaccine safety and effectiveness have been shown to significantly influence vaccination behaviour[9 10]. The relevance of these factors to vaccination decisions has become a focus of policy discussions, such that national and supranational immunisation advisory committees are now evaluating how to best measure confidence in vaccines to inform and evaluate future interventions[11].

Making decisions about our own health in general, and vaccinations in particular, can be a difficult task. Typically, it involves navigating an often intricate healthcare system, discussing the issue with a healthcare professional (HCP), researching the internet, consulting family members and peers, and

1  
2  
3 trying to make sense of all the available information, which is likely to be incomplete and  
4  
5 conflicting[12]. A key challenge in decision-making processes regarding health is weighing up the  
6  
7 benefits of an intervention versus its potential harm. In the case of vaccinations, this process can be  
8  
9 particularly complex as it often entails the assessment of several disease-related variables including  
10  
11 severity, likelihood of catching the pathogen and susceptibility to it, as well as vaccine attributes such  
12  
13 as effectiveness, side-effects and safety, among others[13]. Furthermore, the benefits and drawbacks  
14  
15 of vaccines are normally conveyed in statistical terms, a language that has proven to be difficult to  
16  
17 grasp for most people. For example, results from an experimental study showed that 16% to 20% of  
18  
19 highly educated participants incorrectly answered relatively simple questions about risk magnitudes  
20  
21 (e.g., which represents the larger risk: 1%, 5%, or 10%?)[14]. It is, therefore, conceivable that a  
22  
23 significantly larger proportion of less educated individuals, who constitute a majority of the  
24  
25 population, are likely to misunderstand this type of data.  
26  
27  
28

29  
30 A vast body of research has demonstrated that when people are unable to assess risk using statistical  
31  
32 reasoning they often rely on heuristics, an experience-based and intuitive approach used to facilitate  
33  
34 decision-making[15-17]. Heuristics represent what psychologists have termed ‘cognitive shortcuts’, in  
35  
36 other words, they allow an inference to be made regarding risk without going through numerous  
37  
38 analytical calculations. By its very nature, the use of heuristics can be efficient and accurate in some  
39  
40 occasions, but it can also lead to cognitive errors and flawed decision making when used in  
41  
42 circumstances that require thorough logical analysis[18]. Furthermore, individuals’ judgement is often  
43  
44 influenced by their context and personal or family experiences, whether these are conscious or  
45  
46 not[19]. **Health decisions in general, and vaccination decisions in particular, can also be significantly**  
47  
48 **influenced by patients’ trust in HCPs and the latter’s ability to communicate risk effectively[20].**  
49  
50

51  
52 Although qualitative studies have explored beliefs, attitudes and preferences associated with flu  
53  
54 vaccination uptake, thus far, little research has investigated how participants’ own context and  
55  
56 experiences influence their vaccination decision-making process over time[21-23]. Furthermore, most  
57  
58 studies focus on populations from developed countries; relevant evidence from developing countries  
59  
60

1  
2  
3 is largely missing. Qualitative research on adult tetanus boosters is limited and focuses on neonatal  
4  
5 tetanus.  
6  
7

8  
9 This article aims to provide a detailed account of a mixed method qualitative approach designed to  
10  
11 understand the wider constellation of social and psychological factors likely to influence adult  
12  
13 vaccination behaviour, and their relative importance, as well as the context in which these decisions  
14  
15 take place. Our focus is on social influences, beliefs and attitudes affecting the uptake of seasonal flu  
16  
17 vaccines and tetanus boosters, as these aspects have been found to be particularly influential in  
18  
19 vaccination decision-making. Our research will be conducted in key developed and developing  
20  
21 economies – US, UK, France, India, China and Brazil.  
22  
23

## 24 25 **CONCEPTUAL FRAMEWORK**

26  
27 Our research sits well within the constructivist (or interpretivist) paradigm, which is concerned with  
28  
29 people's experiences from the perspective of those who live them, and whereby the researcher and  
30  
31 participant “jointly create findings from their interactive dialogue and interpretation”[24]. From an  
32  
33 epistemological point of view, however, our position draws from both constructivism and positivism,  
34  
35 in that we recognise there is a degree of bias introduced by the researcher's experience when creating  
36  
37 knowledge, but the researcher will endeavour to be objective and to elicit the participant's experience  
38  
39 in an unprejudiced manner[25].  
40  
41  
42

43  
44 The methodology of this study rests on two theoretical approaches: *heuristics and biases*, specifically  
45  
46 the *availability* heuristic[26], and *customer journey mapping*[27-29]. We explain these below.  
47  
48

49  
50 As mentioned in the previous section, people rely on a limited number of heuristics which reduce the  
51  
52 complexity of calculating probabilities and predicting outcomes to simpler mental operations. A  
53  
54 frequently used heuristic is availability, the tendency to make judgements about the frequency or  
55  
56 probability of an event based on the ease with which a similar episode can be recalled[30]. The use of  
57  
58 this heuristic could yield accurate actions but it could also lead to erroneous decisions. For example, a  
59  
60

1  
2  
3 high-risk individual may be prompted to have a flu vaccine after being exposed to extensive media  
4  
5 coverage about one single flu-related death. The following season, he may decide not to have the flu  
6  
7 vaccine due to a friend experiencing side-effects (e.g. flu-like symptoms) after receiving a flu vaccine.  
8  
9 In both cases, his decision-making is determined by the ease with which the risks associated with flu  
10  
11 or the flu vaccine spring to mind (which vary between the two seasons), as opposed to the statistical  
12  
13 probability of experiencing either adverse effect (which may be constant across the two seasons). The  
14  
15 first decision, however, is aligned with current vaccination recommendations, whereas the second is  
16  
17 not.  
18  
19

20  
21 Additionally, it has been established that people's evaluation of the logical strength of an argument is  
22  
23 often biased by their pre-existent belief in the truth or falsity of the conclusion[31]. For example, if  
24  
25 the same high-risk individual distrusts the medical establishment and the pharmaceutical industry and  
26  
27 prefers alternative medicine instead, it is likely that the news about a flu-related death will have a  
28  
29 lesser impact on his vaccination decision than his friend's reported side-effects – due to mentally  
30  
31 over-weighting the vaccine adverse effects, which are consistent with his pre-existing beliefs.  
32  
33 Importantly, belief-based decision-making need not be conscious[32 33]. Thus, a decision based on  
34  
35 intuition may be later post-rationalised and explained using analytical-sounding arguments, when in  
36  
37 reality cost-benefit analysis was not employed.  
38  
39

40  
41 The customer journey mapping approach is commonly used in service design to capture and evaluate  
42  
43 people's experience of different services. Although some elements may be more important than  
44  
45 others, this approach considers the overall experience of the service user as the result of every element  
46  
47 in a journey through a service. **The customer journey mapping approach has been mainly used by the**  
48  
49 **transport and tourism industries, yet it has also enabled health providers to improve their services by**  
50  
51 **uncovering key areas which deserve attention and focus improvement efforts on such areas[34].** Of  
52  
53 particular note is the *brand touchpoint wheel* developed a decade ago by Dunn and Davies[35]. This  
54  
55 conceives the customer journey as a wheel comprised of three main stages (pre-purchase, purchase  
56  
57  
58  
59  
60

1  
2  
3 and post-purchase experience) and a number of *touchpoints*, which are key points at which the  
4  
5 consumer interacts with a particular product or service (see Fig. 1).  
6  
7

### 9 **Our approach: *journey to vaccination***

10  
11 Most qualitative studies in the field of vaccination decision-making have elicited barriers and enablers  
12  
13 to vaccination using traditional methodological approaches such as explicit enquiry (e.g. why did you  
14  
15 vaccinate?) and indiscriminate use of probes, often within a focus group setting. A key shortcoming of  
16  
17 these approaches is that the impact of individuals' personal circumstances and past experiences on  
18  
19 vaccination decisions over time is seldom explored. Thus, researchers may fail to notice participants'  
20  
21 tendency to fall back on readily available information and report post-decisional rationalisations of  
22  
23 their behaviours rather than actual drivers.  
24  
25

26  
27 In an effort to address these shortcomings, we developed a new qualitative approach which we call  
28  
29 *journey to vaccination*. Anchored on the two complementary lines of thought described above and  
30  
31 nested within the qualitative research tradition, journey to vaccination is a visual exercise in which the  
32  
33 interviewer and the participant jointly build a timeline that captures salient events that led the  
34  
35 participant to get or not to get vaccinated. The exercise starts with a participant's latest flu or tetanus  
36  
37 vaccination experience as an adult; it then extends backwards to the participant's first memory of such  
38  
39 experience. The participant is asked to describe these events, which in turn allows the interviewer to  
40  
41 indirectly elicit a range of factors that affected positively or negatively the decision to get vaccinated.  
42  
43 Importantly, this exercise enables the participant to produce a personal historical narrative, through  
44  
45 which vaccination decisions are discussed as a continuum and not in isolation from each other or from  
46  
47 other important health, or lifestyle-related decisions.  
48  
49

50  
51 The journey to vaccination approach is designed to comprehensively capture psychological but also  
52  
53 social influences on vaccination decisions. Participants are, therefore, asked to recall key actors who  
54  
55 were involved in the vaccination process (e.g. their family) and how they influenced the process.  
56  
57 Emotional aspects of the decision-making are also explored and taken into account.  
58  
59  
60

1  
2  
3  
4  
5 Based on the customer journey mapping approach described earlier and previous evidence on  
6  
7 vaccination behaviour, we envisage a journey to vaccination to be comprised of three stages and a  
8  
9 number of touchpoints at which the individual interacts with related health services (Figure 2): 1) pre-  
10  
11 vaccination period (appointment with HCP, information – websites, news, vaccination campaigns,  
12  
13 peers – and HCP reminders); 2) the vaccination experience itself (location, consultation experience  
14  
15 and vaccination experience); and 3) a post-vaccination experience (vaccine quality – e.g. side-effects,  
16  
17 effectiveness – and post-vaccination advice or information – from HCP, peers and other sources)[10  
18  
19 35 36]. An important component of a journey to vaccination is a cue to action or trigger, which  
20  
21 consists of an internal or external stimulus (e.g. salient health related experiences, advice from a  
22  
23 relative) that prompts individuals to vaccinate or not to vaccinate. Existing evidence suggests that  
24  
25 vaccination triggers may usually take place during the pre-vaccination stage and could sometimes  
26  
27 overlap with vaccination touchpoints[10]. For example, a vaccination reminder letter from the general  
28  
29 practitioner would be both a trigger and a touchpoint, if participants explicitly mention that the letter  
30  
31 prompted them to vaccinate.  
32

33  
34  
35 Figure 3 illustrates a journey to flu non-vaccination of a participant from the UK pilot (see Procedure  
36  
37 section below) who is not at high-risk (i.e. not eligible for free vaccination). The participant  
38  
39 mentioned that an allergy to penicillin discovered when he was younger, which his doctor refused to  
40  
41 acknowledge, had made him anxious about other medications' side-effects, including vaccines. This  
42  
43 was recorded as the first relevant touchpoint and trigger away from vaccination. He then pointed out  
44  
45 that some time ago he had heard on the news there had been flu-related deaths, and that this had been  
46  
47 a cause for concern which made him consider having a flu shot (another touchpoint and trigger to  
48  
49 vaccination). Subsequently, he recalled having the flu and worrying about the consequences of being  
50  
51 out of work due to his self-employed status (trigger to vaccination). The participant then reported that  
52  
53 at that stage he had tried to get a flu vaccine at a pharmacy, but it was out of stock (touchpoint and  
54  
55 trigger away from vaccination). Finally, the participant remembered the vaccine could have side-  
56  
57 effects and decided to stop trying to get vaccinated (trigger away from vaccination). This journey,  
58  
59  
60



1  
2  
3 therefore, does not include a post-vaccination stage. Importantly, analysis of the participant's account  
4  
5 of his journey to non-vaccination indicates a tendency to make decisions based on heuristics rather  
6  
7 than logical analyses. For example, the participant's motivation to have a flu shot after hearing on the  
8  
9 news about flu-related deaths was based on the mental availability of this piece of information and not  
10  
11 his actual risk of death from flu.  
12

## 13 14 15 **STUDY AIMS**

16  
17 The primary aim of this study is to gain deeper understanding of the social and psychological factors  
18  
19 influencing the uptake of two different adult vaccines across key high and middle-income countries  
20  
21 with diverse healthcare systems: The US, the UK, France, India, China and Brazil. Specifically, we  
22  
23 are interested in exploring how people's experiences shape their beliefs, attitudes and behaviour  
24  
25 towards vaccines. A secondary objective is to develop more effective methods to elicit such data.  
26  
27

## 28 29 **METHODS**

### 30 31 **Setting**

32  
33 This research is conducted in six countries, in urban, sparsely populated towns and rural areas of the  
34  
35 following states or regions: New York, New Jersey and Illinois (US); West Midlands, London and  
36  
37 South East (UK); Nord Pas-de-Calais and Île-de-France (France); Maharashtra and Karnataka (India);  
38  
39 Shanghai and Guangzhou (China); and São Paulo and Rio de Janeiro (Brazil).  
40  
41

### 42 43 44 **Sampling and recruitment**

45  
46 A purposive sampling strategy is used to select adult participants who are both vaccinated and not  
47  
48 vaccinated against flu and tetanus and represented a range of socio-demographic characteristics  
49  
50 associated with vaccination uptake, notably age and health status (see Table 1). In an effort to reduce  
51  
52 recall bias[11], only those who have been vaccinated in the past 12 months are eligible to participate.  
53  
54 Potential participants are selected at random from current telephone directories. For consistency, a  
55  
56 minimum of 20 participants are recruited per country, an acceptable sample size for a qualitative  
57  
58 study[37].  
59  
60

Table 1. Purposive sampling strategy

| KEY DEMOGRAPHIC CHARACTERISTICS            | Minimum participant quota per country |
|--------------------------------------------|---------------------------------------|
| Eligible chronic condition*                | 7 with                                |
|                                            | 7 without                             |
| Gender                                     | 8 female                              |
|                                            | 8 male                                |
| Parent/Guardian of child/children under 18 | 4 mothers                             |
|                                            | 4 fathers                             |
| Age                                        | 8 18-49                               |
|                                            | 4 50-64                               |
|                                            | 6 ≥65                                 |
| Socio-economic group (social grade)**      | 7 ABC1                                |
|                                            | 7 C2DE                                |
| Adults who have had ONE of the vaccines    | 4 flu                                 |
|                                            | 3 tetanus                             |
| Have had both tetanus and flu vaccines     | 6                                     |
| Have not had either vaccination            | 6                                     |
| Urban/rural***                             | 5                                     |
| <b>TOTAL</b>                               | <b>20</b>                             |

\*These include asthma, obstructive pulmonary disease (COPD) or bronchitis, heart disease, kidney disease, liver disease, neurological conditions, weakened immune system due to conditions such as HIV and AIDS, or as a result of medication such as steroid tablets or chemotherapy. \*\*A = higher socio-economic group and E = lower socioeconomic group. We used country-specific occupation and income data to determine participants' social grade. \*\*\*The urban/rural quotas for UK and France were relaxed due to the quality and coverage of their public health systems.

We prioritise unvaccinated participants who state that they will either definitely or probably get vaccinated against flu or tetanus “one day” or that they will probably not get vaccinated against flu or tetanus, as these attitudes are representative of the majority of the non-vaccinated population[38]. This is done via the following screening question at the time of recruitment: “Which of the following statements most closely reflects your attitude to the flu and tetanus vaccinations? 1) I will definitely get vaccinated against flu or tetanus one day; 2) I will probably get vaccinated against get vaccinated against flu or tetanus one day; 3) I will probably not get vaccinated against flu or tetanus; 4) I will definitely not get vaccinated against flu or tetanus”.

### Procedure

The data collection is carried out jointly by the first author (UK and US) and Ipsos MORI, a multinational market research firm and their associates. Interviewers have been trained either face-to-face or via teleconference (US) by Ipsos MORI researchers. They have also been provided with a

1  
2  
3 manual containing detailed interview instructions. Interview guides and materials have been translated  
4  
5 into French (France), Hindi, Marathi and Kannada (India), Chinese (China) and Portuguese (Brazil)  
6  
7 by the local research teams. Interviews are carried out by trained interviewers from Imperial College  
8  
9 London, the market research company Ipsos MORI or their local associates. Participants are  
10  
11 interviewed face-to-face in their native language for approximately 60 minutes at home or a central  
12  
13 interviewing facility and interviews are digitally recorded. Participants are fully informed about the  
14  
15 study via a participant information sheet. Written consent is obtained and each participant receives an  
16  
17 equivalent of £11-£78 incentive, depending upon the country and location of the interview, in return  
18  
19 for their time. Before commencing each interview, participants are reminded about the strict  
20  
21 confidentiality of their responses.  
22

23  
24  
25 A pre-pilot was conducted with N = 4 (two researchers from Imperial College London and two from  
26  
27 Ipsos MORI not involved in the present study) to test duration and flow of the interview.  
28

29  
30 Consequently, the interview guide was simplified and shortened. These interviews will not be  
31  
32 included in the final sample for analysis. A piloting technique was subsequently used for the first  
33  
34 three interviews in the UK, whereby the research team observed each interview behind a one-way  
35  
36 mirror and evaluated its quality in real-time. At the end of the session, minor amendments to the  
37  
38 interview guide were agreed and the final interview materials produced.  
39

40  
41 We use two semi-structured and probing interview schedules, one for vaccinated and one for non-  
42  
43 vaccinated participants, constructed through expert consultations and a literature review[10] (See  
44  
45 Table 2). We employ a combination of interviewing techniques to reach a comprehensive  
46  
47 understanding of the factors underpinning vaccination decisions. The schedule comprises six sections  
48  
49 – as follows:  
50

51  
52  
53 Section1 aims to obtain an overview of participants' life and values, to build rapport and to identify  
54  
55 important issues to assist with probing throughout the interview.  
56  
57  
58  
59  
60

1  
2  
3 Section 2 aims to elicit participants' general information-seeking behaviours and influences. We  
4 explore information sources (e.g. media, family, peers, etc.) through which people's knowledge about  
5 and attitudes towards vaccines may be formed.  
6  
7  
8  
9

10  
11 Section 3 examines participants' views towards health, HCPs and adult vaccines. This section aims to  
12 understand how people's perceptions towards their own health and their relationship with HCPs  
13 influence their stance on vaccines. General views on adult vaccines are evaluated by asking  
14 participants to arrange five adult vaccinations (flu, tetanus, pneumonia, hepatitis and measles, mumps  
15 and rubella (MMR)) into one or more groups. By identifying how people group vaccines, and the  
16 reasons for their groupings, we aim to contextualise and gain deeper understanding of their views on  
17 flu vaccines and tetanus containing boosters.  
18  
19  
20  
21  
22  
23  
24

25  
26  
27 Section 4 explores participants' journeys to vaccination (or non-vaccination) for both flu vaccines and  
28 tetanus containing boosters. We aim to undertake an in-depth exploration of the vaccination decision-  
29 making process by identifying important aspects that lead people to vaccinate or not to vaccinate.  
30  
31  
32  
33  
34

35 In an effort to circumvent availability bias, we avoid asking direct questions such as 'why did you  
36 have a flu shot?' Instead, we explore the set of circumstances and emotions that drive participants to  
37 accept or refuse vaccination, aided by an elicitation technique called *laddering*, which provides a  
38 simple and systematic way of establishing people's core values and beliefs, and the linkages between  
39 these and key behaviours, in this case, vaccination[39]. To minimise post-rationalisation, we do not  
40 use probes in this section of the interview.  
41  
42  
43  
44  
45  
46  
47  
48

49 Section 5 of the interview examines participants' attitudes toward children's vaccinations. We aim to  
50 understand whether people's views about adult vaccines correspond with their views about children's  
51 and how.  
52  
53  
54  
55  
56  
57  
58  
59  
60

Finally, in section 6 we explore participants' knowledge of the two diseases and vaccines (i.e. flu and tetanus) to understand to what extent their decision-making is influenced by facts.

Key socio-demographic information is collected at the end of the interview – including employment status, occupation, health insurance, perceived ability to afford essential goods, level of education, marital status, religion and ethnicity.

**Table 2. Interview schedule**

| Interview topic (sections 1-6)                   | Key interview questions                                                                                                                                                                                                                                                                                                                                                                                                                                                                                                                                                                                                                                                                                                                                                                                                                                                                                                         |
|--------------------------------------------------|---------------------------------------------------------------------------------------------------------------------------------------------------------------------------------------------------------------------------------------------------------------------------------------------------------------------------------------------------------------------------------------------------------------------------------------------------------------------------------------------------------------------------------------------------------------------------------------------------------------------------------------------------------------------------------------------------------------------------------------------------------------------------------------------------------------------------------------------------------------------------------------------------------------------------------|
| 1. Overview of life and values                   | <ul style="list-style-type: none"> <li>• Tell me about yourself and your life, for example, what you spend your time doing and how you enjoy yourself.</li> <li>• What sorts of things do you worry about?</li> </ul>                                                                                                                                                                                                                                                                                                                                                                                                                                                                                                                                                                                                                                                                                                           |
| 2. Information seeking behaviours and influences | <ul style="list-style-type: none"> <li>• Can you tell me how you find out what is happening generally in the world?</li> <li>• And who are the people whose opinion you value or with whom you discuss important issues with? And why is that?</li> </ul>                                                                                                                                                                                                                                                                                                                                                                                                                                                                                                                                                                                                                                                                       |
| 3. Views about health and vaccinations           | <ul style="list-style-type: none"> <li>• Can I ask how you feel your own health is?</li> <li>• When you think about your health, what are all the things that come to mind? Do you do anything to keep healthy? What sorts of things?</li> <li>• Which doctors or nurses do you particularly trust and listen to, if any? And why is that? Why is that important to you?</li> <li>• Thinking now about vaccinations, what are all the things that come to mind when you think about vaccinations?</li> <li>• Looking at these cards, which are all adult vaccinations, please can you sort them into groups?</li> </ul>                                                                                                                                                                                                                                                                                                         |
| 4. Journey to vaccination (or non-vaccination)   | <ul style="list-style-type: none"> <li>• How would you describe to a friend how you came to have (or not to have) the vaccination? What things happened that meant you ended up getting (or not getting) vaccinated?</li> <li>• What would you say happened at that point that triggered that change (or decision)? And why was that important?</li> <li>• How did you know where to go for the vaccination? How did you book an appointment and fit it into your plans? What other things were competing for your time?</li> <li>• Before you were vaccinated, do you remember any times when you thought about or started the process towards being vaccinated but didn't end up getting vaccinated? (vaccinated)</li> <li>• Of all of those things, which would you say was the most important thing that led to you not getting vaccinated? And why is that? And the second most important thing? And the third?</li> </ul> |

|                                                              |                                                                                                                                                                                     |
|--------------------------------------------------------------|-------------------------------------------------------------------------------------------------------------------------------------------------------------------------------------|
|                                                              | (non-vaccinated)                                                                                                                                                                    |
| 5. Children's vaccinations                                   | • In general, do you think people should vaccinate their children against tetanus? Why/why not?                                                                                     |
|                                                              | • And do you think people should vaccinate their children against flu? Why/why not?                                                                                                 |
| 6. Factual knowledge on flu and tetanus and related vaccines | • How much would you say you know about flu/tetanus? How serious or life-threatening do you think the disease is? In general, how likely do you think you are to catch the disease? |
|                                                              | • How much would you say you know about the vaccine for flu/tetanus? Do you happen to know how often it is recommended that you have it, or who it is recommended for?              |

### Data analyses

The recorded interviews are professionally transcribed and translated into English, and checked for accuracy by Ipsos MORI. To ensure reliability of coding and interpretation all the transcripts will be analysed by one academic researcher (AW) and 50% of the transcripts will be analysed independently by a second researcher[40]. Differences will be resolved through dialogue until consensus is reached.

Using thematic analysis, an initial categorising system will be developed based on the study objectives and the topics explored[41 42]. New themes and sub-themes emerging from the data analysis will be identified and included when consensus is reached regarding their relevance. A final thematic index will be produced to code all data – and verbatim quotes to support the extracted themes will be tabulated. Additionally, a journey to vaccination for flu and other for tetanus will be produced for each participant. Differences and commonalities emerging from these data will be identified and synthesised, and, if possible, typical journeys will be proposed.

### Ethics and dissemination

This is a collaborative study designed and undertaken by Imperial College London (academic partner), Sanofi Pasteur (commercial partner) and Ipsos MORI (market research partner). A steering group comprising Imperial College London senior researchers, Sanofi Pasteur directors and Ipsos MORI research directors provide on-going academic input, project management and strategic direction.

Ipsos MORI follows the European Society of Market Research Organisations (ESOMAR) Code of Conduct for international fieldwork. This research is also carried out in accordance with the requirements of the international quality standard for market research, ISO 20252:2006, International general company standard ISO 9001:2008 and International standard for information security ISO 27001:2005. Additionally, this study was approved by Imperial College Research Ethical Committee (ICREC) in the UK, American Institutes for Research (AIR) in the US, Commission nationale de l'informatique et des libertés (CNIL) and Comité de protection des personnes "Ile-de-France III" in France, Safe Search Independent Ethics Committee in India, Shanghai Clinical Research Center in China and Comissão Nacional de Ética em Pesquisa (CONEP) in Brazil.

The nature of the research topic and the sample (general population) make this study one with few ethical issues. However, we recognise that all subjects should be willing and able to participate in this study and that there is a small possibility that respondents may disclose information that could potentially cause psychological distress for the individual if the purposes of the research are misunderstood. To address these issues, all participants are informed about the purposes of the research and written consent is obtained from the participants prior to their involvement in the study. Furthermore, when designing the interview schedule, there has been due consideration to the phrasing of the questions so as not to attribute blame, for example, for not carrying out responsible duties associated with participants' own health or that of the general public.

Our findings will be disseminated to relevant policy, industry, clinical and academic audiences through different outlets. These will be presented as practical recommendations at policy and industry meetings and healthcare professionals' forums. Our results will also be presented at academic conferences and published in peer-reviewed journals.

## CONCLUSION

Vaccination uptake is significantly influenced by a constellation of social and psychological factors. In order to capture these factors, and to understand their relative importance, we need to go beyond

1  
2  
3 readily available, and in some cases, post-rationalised responses, and explore underlying motivations  
4 which may be driving vaccination behaviour. This study combines qualitative techniques, service  
5 design and psychology theories to develop the journey to vaccination, a new approach aimed at  
6 understanding vaccination decision-making processes across time. The journey to vaccination  
7 approach will allow us to explore how people's beliefs and attitudes towards vaccination are shaped  
8 by their context and experiences, and to evaluate whether vaccination decision-making is driven by  
9 heuristic judgement, logical analysis or both, and to what extent.  
10  
11  
12  
13  
14  
15  
16  
17  
18

19 The global scope of this research will allow us to perform cross cultural comparisons, which will in  
20 turn shed light on key internal (e.g. beliefs, perceptions) and external (e.g. HCP advice, vaccine  
21 availability, cost) stimuli which influence vaccination behaviour across different vaccines,  
22 geographies and populations. Our findings can provide a deeper understanding of the barriers and  
23 drivers to adult vaccination, which may in turn lead to more effective interventions.  
24  
25  
26  
27  
28  
29  
30  
31  
32  
33  
34  
35  
36  
37  
38  
39  
40  
41  
42  
43  
44  
45  
46  
47  
48  
49  
50  
51  
52  
53  
54  
55  
56  
57  
58  
59  
60



1  
2  
3 **Figure 1.** The brand touchpoint wheel.

4 Source: Dunn & Davis (2003)[35]  
5  
6  
7

8 **Figure 2.** Journey to vaccination  
9  
10

11 **Figure 3.** Example of a journey to flu non-vaccination  
12  
13  
14  
15  
16  
17  
18  
19  
20  
21  
22  
23  
24  
25  
26  
27  
28  
29  
30  
31  
32  
33  
34  
35  
36  
37  
38  
39  
40  
41  
42  
43  
44  
45  
46  
47  
48  
49  
50  
51  
52  
53  
54  
55  
56  
57  
58  
59  
60

For peer review only

### Contributions

All the authors agree with the manuscript's contents. AW, NS and MM contributed to the design of the study and interview schedule. All authors contributed to the write-up.

### Funding and competing interests

AW and NS are funded by an unrestricted research grant from Sanofi Pasteur and also by the UK National Institute for Health Research (NIHR), via the Imperial College's Patient Safety Translational Research Centre ([www.cpssq.org](http://www.cpssq.org)). The fieldwork and associated research costs are funded by Sanofi Pasteur. The views expressed are those of the authors and not necessarily those of the NIHR, the Department of Health or Sanofi Pasteur. The funders do not have any editorial control over the work reported in this article. The authors have no other relevant affiliations or financial involvement with any organisation or entity with a financial interest in or financial conflict with the subject matter or issues discussed in the manuscript, apart from those disclosed.

### Acknowledgements

We are very grateful to Bruno Rigole and Angus Thomson (Sanofi Pasteur), and Jonathan Nicholls, Helen Cox, Kate Duxbury, Gareth Turley, Reena Sangar and Rebecca Szyndler (Ipsos MORI), as well as the local research partners, for their valuable advice and management support throughout this study. The authors would also like to thank Marion Dolbeau (Sanofi Pasteur) for her contribution to the design and execution of this research.

## References

1. UNICEF. Immunization: the big picture. Accessed on 1 July 2013. Available from: [http://www.unicef.org/immunization/index\\_bigpicture.html](http://www.unicef.org/immunization/index_bigpicture.html).
2. WHO, UNICEF. Global immunization vision and strategy 2006-2015. Geneva, Switzerland, 2005.
3. Zhang J, While AE, Norman IJ. Nurses' knowledge and risk perception towards seasonal influenza and vaccination and their vaccination behaviours: A cross-sectional survey. *Int J Nurs Stud* 2011;**48**(10):1281-89.
4. Centers for Disease Control and Prevention. Recommended Adult Immunization Schedule — United States, 2012. *MMWR* 2012;**61**(04):1-7.
5. Ghendon Y. Influenza--its impact and control. *World Health Stat Q* 1992;**45**(2-3):306-11
6. WHO. Tetanus vaccine. *Wkly Epidemiol Rec* 2006;**81**(1):197-208.
7. Nennig M, Shinefield HR, Edwards KM, Black SB, Fireman BH. Prevalence and incidence of adult pertussis in an urban population. *JAMA* 1996;**275**(21):1672-74.
8. WHO. Vaccine-preventable diseases: monitoring system 2010 global summary. Accessed on 1 July 2013. Available from: [http://whqlibdoc.who.int/hq/2010/WHO\\_IVB\\_2010\\_eng.pdf](http://whqlibdoc.who.int/hq/2010/WHO_IVB_2010_eng.pdf).
9. Kohlhammer Y, Schnoor M, Schwartz M, Raspe H, Schäfer T. Determinants of influenza and pneumococcal vaccination in elderly people: a systematic review. *Public Health* 2007;**121**(10):742-51.
10. Wheelock A, Thomson A, Sevdalis N. Social and psychological factors underlying adult vaccination behavior: lessons from seasonal influenza vaccination in the US and the UK. *Expert Rev Vaccines* 2013:1-9.
11. NVAC. NVAC Vaccine Hesitancy Working Group Charge. Accessed on 1 July 2013. Available from: <http://www.hhs.gov/nvpo/nvac/subgroups/nvac-vaccine-hesitancy-wgcharge.html>.
12. Hunink MM. *Decision making in health and medicine: integrating evidence and values*: Cambridge University Press, 2001.
13. Serpell L, Green J. Parental decision-making in childhood vaccination. *Vaccine* 2006;**24**(19):4041-46.

- 1  
2  
3 14. Lipkus IM, Samsa G, Rimer BK. General Performance on a Numeracy Scale among Highly  
4  
5 Educated Samples. *Med Decis Making* 2001;**21**(1):37-44.
- 6  
7 15. Meehl PE. *Clinical versus statistical prediction: A theoretical analysis and review of the*  
8  
9 *literature*. Minesota: University of Minesota Press, 1954.
- 10  
11 16. Simon H. *Models of man: Social and rational*. New York: Wiley.
- 12  
13 17. Kahneman D, Tversky A. On the Psychology of Prediction. *Psych Rev* 1973;**80**(4):237-51.
- 14  
15 18. Kahneman D, Slovic P, Tversky A. *Judgment under uncertainty: Heuristics and biases*. New  
16  
17 York: Cambridge University Press, 1982.
- 18  
19 19. De Martino B, Kumaran D, Seymour B, Dolan RJ. Frames, biases, and rational decision-making  
20  
21 in the human brain. *Science* 2006;**313**(5787):684-87.
- 22  
23 20. Alaszewski A, Horlick-Jones T. How can doctors communicate information about risk more  
24  
25 effectively? *BMJ* 2003;**327**(7417):728.
- 26  
27 21. Evans MR, Prout H, Prior L, Tapper-Jones LM, Butler CC. A qualitative study of lay beliefs about  
28  
29 influenza immunisation in older people. *Brit J Gen Pract* 2007;**57**(538):352.
- 30  
31 22. Kwong EW-y, Pang SM-c, Choi P-p, Wong TK-s. Influenza vaccine preference and uptake among  
32  
33 older people in nine countries. *J Adv Nurs* 2010;**66**(10):2297-308.
- 34  
35 23. Telford R, Rogers A. What influences elderly peoples' decisions about whether to accept the  
36  
37 influenza vaccination? A qualitative study. *Health Educ Res* 2003;**18**(6):743-53.
- 38  
39 24. Ponterotto JG. Qualitative research in counseling psychology: A primer on research paradigms  
40  
41 and philosophy of science. *J Couns Psychol* 2005;**52**(2):126.
- 42  
43 25. Sciarra D. The role of the qualitative researcher. In: Kopala M, Suzuki LA, eds. *Using qualitative*  
44  
45 *methods in psychology*. Thousand Oaks, CA: Sage, 1999:37-48.
- 46  
47 26. Tversky A, Kahneman D. Availability: A heuristic for judging frequency and probability.  
48  
49 *Cognitive Psychol* 1973;**5**(2):207-32.
- 50  
51 27. Kingman-Brundage J. The ABCs of Service System Blueprinting. In: Lovelock CH, ed. *Managing*  
52  
53 *Services: Marketing, Operations and Human Resources* New Jersey: Prentice-Hall  
54  
55 *International, Inc*, 1992:96-102.
- 56  
57 28. Shostack GL. Designing services that deliver. *Harvard bus rev* 1984;**62**(1):133-39.
- 58  
59  
60

- 1  
2  
3 29. Bitner MJ. Servicescapes: the impact of physical surroundings on customers and employees. J  
4 Marketing 1992;57-71.  
5  
6  
7 30. Tversky A, Kahneman D. Judgment under uncertainty: Heuristics and biases. Science  
8 1974;185(4157):1124-31.  
9  
10  
11 31. Evans JSB, Curtis-Holmes J. Rapid responding increases belief bias: Evidence for the dual-  
12 process theory of reasoning. Think Reasoning 2005;11(4):382-89.  
13  
14  
15 32. Haidt J. The emotional dog and its rational tail: a social intuitionist approach to moral judgment.  
16 Psychol Rev 2001;108(4):814.  
17  
18  
19 33. Wilson TD. *Strangers to ourselves: Discovering the adaptive unconscious*. Cambridge: Harvard  
20 University Press, 2009.  
21  
22  
23 34. Westbrook JI, Coiera EW, Gosling AS, Braithwaite J. Critical incidents and journey mapping as  
24 techniques to evaluate the impact of online evidence retrieval systems on health care delivery  
25 and patient outcomes. Int J Med Inform 2007;76(2-3):234-45.  
26  
27  
28  
29 35. Dunn M, Davis SM. *Building the brand-driven business. Operationalize your brand to drive*  
30 *profitable growth*. San Francisco: Tossey-Bass, 2002.  
31  
32  
33 36. Shaw C, Ivens J. *Building great customer experiences*: Palgrave Macmillan, 2002.  
34  
35  
36 37. Patton MQ. Qualitative Research. Encyclopedia of Statistics in Behavioral Science: John Wiley &  
37 Sons, Ltd, 2005.  
38  
39  
40 38. Leask J, Kinnersley P, Jackson C, Cheater F, Bedford H, Rowles G. Communicating with parents  
41 about vaccination: a framework for health professionals. BMC pediatrics 2012;12(1):154.  
42  
43  
44 39. Reynolds TJ, Olson JC. *Understanding consumer decision making: the means-end approach to*  
45 *marketing and advertising strategy*. New Jersey: Psychology Press, 2001.  
46  
47  
48 40. Pope C, Ziebland S, Mays N. Analysing qualitative data. BMJ 2000;320(7227):114-16.  
49  
50  
51 41. Silverman D. *Interpreting qualitative data: methods for analyzing talk, text and interaction*.  
52 London: Sage, 2001.  
53  
54  
55 42. Flick U. *An introduction to qualitative research*. 4th ed. London: Sage, 2009.  
56  
57  
58  
59  
60

1  
2  
3  
4  
5  
6  
7  
8  
9  
10  
11  
12  
13  
14  
15  
16  
17  
18  
19  
20  
21  
22  
23  
24  
25  
26  
27  
28  
29  
30  
31  
32  
33  
34  
35  
36  
37  
38  
39  
40  
41  
42  
43  
44  
45  
46  
47  
48  
49  
50  
51  
52  
53  
54  
55  
56  
57  
58  
59  
60

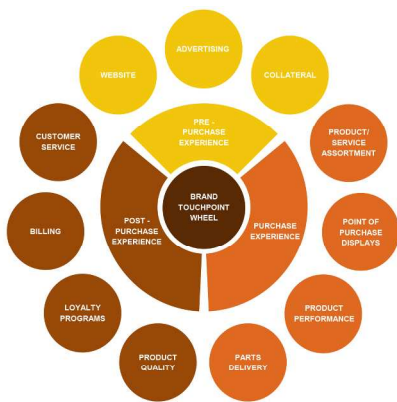

Figure 1. The brand touchpoint wheel.  
Source: Dunn & Davis (2003)[30]

190x275mm (300 x 300 DPI)

1  
2  
3  
4  
5  
6  
7  
8  
9  
10  
11  
12  
13  
14  
15  
16  
17  
18  
19  
20  
21  
22  
23  
24  
25  
26  
27  
28  
29  
30  
31  
32  
33  
34  
35  
36  
37  
38  
39  
40  
41  
42  
43  
44  
45  
46  
47  
48  
49  
50  
51  
52  
53  
54  
55  
56  
57  
58  
59  
60

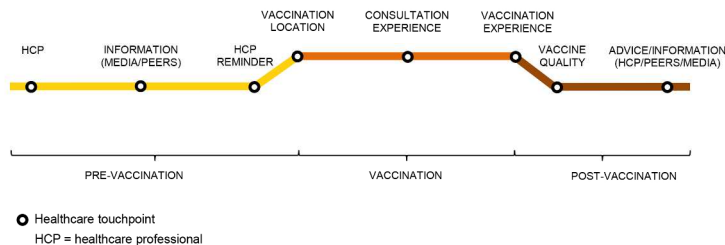

Figure 2. Journey to vaccination

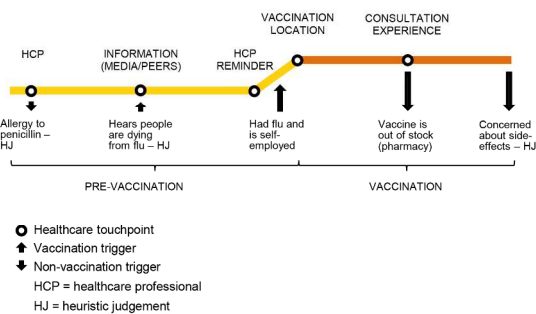

Figure 3. Example of a journey to flu non-vaccination

190x275mm (300 x 300 DPI)
